# Supplementary material
Source: publisher site journal article supplement (https://www.dovepress.com/article/413569)
Supplement: Supplementary file 1 [file get_supplementary_file.php]

## **Supplementary materials**

Supplementary Table 1: A total of 1793 immune-related genes.

Supplementary Table 2: Differentially expressed genes (DEGs) between DN patients and controls in GSE30528.

Supplementary Table 3: The sequences of primers used in real-time PCR.

Supplementary Table 4: Hyperparameter selection table for machine learning models.

Supplementary Table 5: Evaluation metrics for the validation set GSE47183.

Supplementary Table 6: Evaluation metrics for the validation set GSE30529.

Supplementary Table 1: A total of 1793 immune-related genes

Symbol

|          |        |        |            |          |
|----------|--------|--------|------------|----------|
| AZGP1    | NR1I3  | FGF4   | IGHD4-17   | PML      |
| B2M      | NR2C1  | FGF5   | IGHD4-23   | AEN      |
| CALR     | NR2C2  | FGF6   | IGHD4-4    | CYBB     |
| CANX     | NR2E1  | FGF7   | IGHD5-12   | BPIFA2   |
| CD1A     | NR2E3  | FGF8   | IGHD5-18   | ISG20    |
| CD1B     | NR2F1  | FGF9   | IGHD5-24   | BCL3     |
| CD1C     | NR2F2  | VEGFD  | IGHD5-5    | ISG20L2  |
| CD1D     | NR2F6  | FIGNL2 | IGHD6-13   | NOX5     |
| CD1E     | NR3C1  | FLT3LG | IGHD6-19   | NOX3     |
| CD4      | NR3C2  | FSHB   | IGHD6-25   | DUOX2    |
| CD8A     | NR4A1  | GAL    | IGHD6-6    | TLR3     |
| CD8B     | NR4A2  | GALP   | IGHD7-27   | TFRC     |
| CD74     | NR4A3  | GAST   | IGHE       | IFIH1    |
| CREB1    | NR5A1  | GCG    | IGHG1      | LRP1     |
| CTSB     | NR5A2  | GDF1   | IGHG2      | TRIM5    |
| CTSE     | NR6A1  | GDF10  | IGHG3      | IDO1     |
| CTSL     | NRP1   | GDF11  | IGHG4      | GDF15    |
| CTSS     | NRP2   | GDF2   | IGHJ1      | NEDD4    |
| FCER1G   | OGFR   | GDF3   | IGHJ2      | ADIPOQ   |
| FCGRT    | OPRD1  | GDF5   | IGHJ3      | STAT3    |
| PDIA3    | OPRK1  | GDF6   | IGHJ4      | STAT1    |
| HFE      | OPRL1  | GDF7   | IGHJ5      | IFNL2    |
| HLA-A    | OPRM1  | GDF9   | IGHJ6      | SOCS3    |
| HLA-B    | OSMR   | GDNF   | IGHM       | SEMG1    |
| HLA-C    | OXTR   | GH1    | IGHV1-18   | TNFSF10  |
| HLA-DMA  | PGR    | GH2    | IGHV1-2    | CCL20    |
| HLA-DMB  | PGRMC2 | GHRH   | IGHV1-24   | SOCS1    |
| HLA-DOA  | PPARA  | GHRL   | IGHV1-3    | RNASEL   |
| HLA-DOB  | PPARD  | GIP    | IGHV1-45   | IRF1     |
| HLA-DPA1 | PRLHR  | GKN1   | IGHV1-46   | IL15     |
| HLA-DPB1 | PRLR   | GMFB   | IGHV1-58   | APOBEC3F |
| HLA-DQA1 | PTGER1 | GMFG   | IGHV1-69   | PLAAT4   |
| HLA-DQA2 | PTGER2 | GNRH1  | IGHV1-8    | CHIT1    |
| HLA-DQB1 | PTGER3 | GNRH2  | IGHV1-38-4 | CD40     |
| HLA-DRA  | PTGER4 | GPHA2  | IGHV1-69-2 | TLR7     |
| HLA-DRB1 | PTGFR  | GPHB5  | IGHV2-26   | PPIA     |
| HLA-DRB3 | PTH1R  | GPI    | IGHV2-5    | ZYX      |
| HLA-DRB4 | PTH2R  | GREM1  | IGHV2-70   | NLRX1    |
| HLA-DRB5 | RARA   | GREM2  | IGHV3-11   | PGC      |
| HLA-E    | RARB   | GRP    | IGHV3-13   | VEGFA    |
| HLA-F    | RARG   | GUCA2A | IGHV3-15   | IKBKE    |
| HLA-G    | RORA   | HBEGF  | IGHV3-16   | ISG15    |
| HLA-H    | RORB   | HDGF   | IGHV3-20   | DHX58    |
| MR1      | RORC   | HDGFL3 | IGHV3-21   | TNFAIP3  |

|          |           |          |            |          |
|----------|-----------|----------|------------|----------|
| HSPA1A   | RXFP1     | IAPP     | IGHV3-23   | TFR2     |
| HSPA1B   | RXFP2     | IFNE     | IGHV3-30   | FCN2     |
| HSPA1L   | RXRA      | IFNK     | IGHV3-30-3 | MUC4     |
| HSPA2    | RXRB      | IFNW1    | IGHV3-30-5 | F2R      |
| HSPA4    | RXRG      | IGF1     | IGHV3-33   | ELN      |
| HSPA5    | S1PR1     | IGF2     | IGHV3-35   | IL27     |
| HSPA6    | S1PR2     | IL11     | IGHV3-38   | MAPT     |
| HSPA8    | SCTR      | IL12A    | IGHV3-43   | LYZ      |
| HSP90AA1 | SDC1      | IL16     | IGHV3-48   | CCL5     |
| HSP90AB1 | SDC2      | IL17B    | IGHV3-49   | LEP      |
| ICAM1    | SDC3      | IL17C    | IGHV3-53   | CYLD     |
| IFNA1    | SDC4      | IL17D    | IGHV3-64   | KLKB1    |
| IFNA2    | SORT1     | IL17F    | IGHV3-66   | CST4     |
| IFNA4    | SSTR1     | IL19     | IGHV3-7    | CSRP1    |
| IFNA5    | SSTR2     | IL1F10   | IGHV3-72   | MAPK14   |
| IFNA6    | SSTR5     | IL36RN   | IGHV3-73   | JUN      |
| IFNA7    | ST2       | IL36A    | IGHV3-74   | ITGAV    |
| IFNA8    | TACR1     | IL37     | IGHV3-9    | IRF5     |
| IFNA10   | TEK       | IL36B    | IGHV3-38-3 | CCR6     |
| IFNA13   | TGFBR1    | IL36G    | IGHV3-69-1 | IL12B    |
| IFNA14   | TGFBR2    | IL1RN    | IGHV4-28   | TLR8     |
| IFNA16   | TGFBR3    | IL20     | IGHV4-30-1 | GPLY     |
| IFNA17   | THRA      | IL21     | IGHV4-30-2 | CD81     |
| IFNA21   | THRB      | IL23A    | IGHV4-30-4 | EIF2AK2  |
| IFNG     | TIE1      | IL24     | IGHV4-31   | APOM     |
| KIR2DL1  | TNFRSF10C | IL25     | IGHV4-34   | CACYBP   |
| KIR2DL2  | TNFRSF10D | IL26     | IGHV4-39   | NOD1     |
| KIR2DL3  | TNFRSF11A | IFNL3    | IGHV4-4    | MAPK8    |
| KIR2DL4  | TNFRSF12A | IL3      | IGHV4-59   | MAPK3    |
| KIR2DS1  | TNFRSF13B | IL31     | IGHV4-61   | BST2     |
| KIR2DS3  | TNFRSF13C | IL32     | IGHV4-38-2 | BPHL     |
| KIR2DS4  | TNFRSF14  | IL33     | IGHV5-51   | PLA2G2A  |
| KIR2DS5  | TNFRSF17  | IL34     | IGHV5-10-1 | GRN      |
| KIR3DL1  | TNFRSF18  | IL5      | IGHV6-1    | NEWENTRY |
| KIR3DL2  | TNFRSF19  | IL6ST    | IGHV7-4-1  | PDGFRA   |
| KLRC1    | TNFRSF1A  | IL7      | IGHV7-81   | GNAI1    |
| KLRC2    | TNFRSF1B  | IL9      | IGK        | WNT5A    |
| KLRC3    | TNFRSF21  | INHA     | IGKC       | FURIN    |
| KLRD1    | TNFRSF25  | INHBA    | IGKDEL     | ADAR     |
| LTA      | TNFRSF4   | INHBB    | IGKJ       | TYK2     |
| CIITA    | TNFRSF6B  | INHBC    | IGKJ1      | NOS2     |
| MICA     | TNFRSF8   | INHBE    | IGKJ2      | TRAF3    |
| MICB     | TNFRSF9   | INS      | IGKJ3      | TPT1     |
| NFYA     | TRHR      | INS-IGF2 | IGKJ4      | TPM2     |
| NFYB     | TSHR      | INSL3    | IGKJ5      | NEO1     |
| NFYC     | TUBB3     | INSL4    | IGKV@      | AHNAK    |

|          |        |        |           |           |
|----------|--------|--------|-----------|-----------|
| LGMN     | VIPR1  | INSL5  | IGKV1-12  | TLR1      |
| PSMB8    | VIPR2  | INSL6  | IGKV1-13  | TK2       |
| PSMC1    | PTPN11 | JAG1   | IGKV1-16  | PRDX2     |
| PSMC2    | ICAM2  | JAG2   | IGKV1-17  | MX2       |
| PSMC3    | ITGAL  | FGF7P6 | IGKV1-27  | FGF2      |
| PSMC4    | ITGB2  | FGF7P3 | IGKV1-33  | FGA       |
| PSMC5    | PAK1   | KITLG  | IGKV1-37  | TCF7L2    |
| PSMC6    | NCR2   | KL     | IGKV1-39  | F2RL1     |
| PSMD1    | TYROBP | LACRT  | IGKV1-5   | TKFC      |
| PSMD2    | LCK    | LEFTY1 | IGKV1-6   | MSR1      |
| PSMD3    | FCGR3A | LEFTY2 | IGKV1-8   | NFKBIZ    |
| PSMD4    | FCGR3B | LHB    | IGKV1-9   | LMBR1     |
| PSMD5    | NCR1   | LIF    | IGKV1D-12 | EPPIN     |
| PSMD7    | NCR3   | LRSAM1 | IGKV1D-13 | SRC       |
| PSMD8    | CD247  | LTB    | IGKV1D-16 | MPO       |
| PSMD10   | ZAP70  | LTBP2  | IGKV1D-17 | ELAVL1    |
| PSMD11   | LCP2   | LTBP3  | IGKV1D-33 | ROBO3     |
| PSMD13   | LAT    | LTBP4  | IGKV1D-37 | SP1       |
| PSME1    | PLCG1  | MDK    | IGKV1D-39 | SOD1      |
| PSME2    | SH3BP2 | MIA    | IGKV1D-42 | PDF       |
| RELB     | FYN    | MLN    | IGKV1D-43 | DLL4      |
| RFX5     | SHC2   | MSTN   | IGKV1D-8  | ECD       |
| RFXAP    | SHC4   | NAMPT  | IGKV2-24  | SLC11A1   |
| SLC10A2  | SHC3   | NDP    | IGKV2-28  | DMBT1     |
| TAP1     | SHC1   | NENF   | IGKV2-30  | STING1    |
| TAP2     | GRB2   | NGF    | IGKV2-40  | SKIV2L    |
| TAPBP    | SOS1   | NMB    | IGKV2D-24 | SEMG2     |
| THBS1    | SOS2   | NODAL  | IGKV2D-28 | DES       |
| SEM1     | ARAF   | CCN3   | IGKV2D-29 | DCK       |
| KLRC4    | BRAF   | NPFF   | IGKV2D-30 | DAXX      |
| AP3B1    | RAF1   | NPPA   | IGKV2D-40 | TNFRSF10A |
| RFXANK   | HCST   | NPPB   | IGKV3-11  | TNFRSF10B |
| PSMD6    | CD48   | NPPC   | IGKV3-15  | EED       |
| PSME3    | CD244  | NPY    | IGKV3-20  | CCL4      |
| PSMD14   | PRKCA  | NRG1   | IGKV3-7   | LIMS1     |
| CLEC4M   | PRKCG  | NRG2   | IGKV3D-11 | LALBA     |
| IFI30    | SH2D1B | NRG3   | IGKV3D-15 | APOBEC3H  |
| PROCR    | SH2D1A | NRG4   | IGKV3D-20 | TMPRSS6   |
| ADRM1    | FAS    | NRTN   | IGKV3D-7  | SPINK5    |
| ECPAS    | GZMB   | NTF3   | IGKV4-1   | MARCO     |
| TRPC4AP  | PRF1   | NTF4   | IGKV5-2   | BECN1     |
| CD209    | CASP3  | NTS    | IGKV6-21  | TNFSF11   |
| UBXN1    | BID    | NUDT6  | IGKV6D-21 | KNG1      |
| ERAP1    | CD3D   | OGN    | IGKV6D-41 | CSK       |
| TAPBPL   | CD3E   | OSGIN1 | IGL       | KLRK1     |
| KIR2DL5A | CD3G   | OSM    | IGLC1     | KCNH2     |

|          |         |         |           |          |
|----------|---------|---------|-----------|----------|
| ERAP2    | PTPRC   | OSTN    | IGLC2     | JUND     |
| ULBP3    | ITK     | OXT     | IGLC3     | JAK1     |
| ULBP2    | TEC     | ENDOU   | IGLC6     | CLDN4    |
| ULBP1    | NCK1    | PDGFA   | IGLC7     | CCL28    |
| KIR3DL3  | NCK2    | PDGFB   | IGLJ      | RNASE3   |
| RAET1E   | GRAP2   | PDGFC   | IGLJ1     | RN7SL1   |
| RAET1L   | PAK2    | PDGFD   | IGLJ2     | IRF7     |
| UBR1     | PAK3    | PDGFRL  | IGLJ3     | IREB2    |
| RAET1G   | PAK4    | PGF     | IGLJ4     | ILK      |
| PDIA2    | PAK6    | PMCH    | IGLJ5     | IL18     |
| HAMP     | PAK5    | PNOC    | IGLJ6     | IL17A    |
| PI3      | RHOA    | POMC    | IGLJ7     | LTB4R    |
| CAMP     | CDC42   | PPBPP2  | IGLV@     | APOBEC3A |
| DEFB4A   | CD28    | PPY     | IGLV1-36  | MASP2    |
| PPBP     | ICOS    | PRL     | IGLV1-40  | TRIM27   |
| REG3G    | MAP3K8  | PRLH    | IGLV1-44  | RELA     |
| CXCL14   | MAP3K14 | PROK1   | IGLV1-47  | IL7R     |
| CXCL16   | CTLA4   | PSPN    | IGLV1-50  | IL1A     |
| SLPI     | CBLC    | PTH     | IGLV1-51  | PTX3     |
| CXCL8    | CBL     | PTH2    | IGLV10-54 | IFNAR2   |
| CXCL10   | CBLB    | PTHLH   | IGLV11-55 | IFN1@    |
| CXCL9    | CDK4    | PTN     | IGLV2-11  | SYTL1    |
| CXCL5    | RASGRP1 | PYY     | IGLV2-14  | APOBEC3C |
| CXCL11   | PDK1    | QRFP    | IGLV2-18  | DDX17    |
| CXCL6    | PRKCQ   | RABEP1  | IGLV2-23  | PTGS2    |
| CXCL1    | TRAC    | RABEP2  | IGLV2-33  | HTR1A    |
| CXCL12   | TRAJ1   | REG1A   | IGLV2-8   | SEPTIN7  |
| CXCL13   | TRAJ2   | RETN    | IGLV3-1   | CD40LG   |
| CXCL2    | TRAJ3   | RETNLB  | IGLV3-10  | CD14     |
| PF4      | TRAJ4   | RLN1    | IGLV3-12  | MASP1    |
| XCL1     | TRAJ5   | RLN2    | IGLV3-16  | PROC     |
| CXCL3    | TRAJ6   | RLN3    | IGLV3-19  | MAP2K2   |
| DEFB103B | TRAJ7   | SCG2    | IGLV3-21  | MAP2K1   |
| CCL13    | TRAJ8   | SCGB3A1 | IGLV3-22  | HRG      |
| CCL1     | TRAJ9   | SCT     | IGLV3-25  | NDRG1    |
| DEFB1    | TRAJ10  | AIMP1   | IGLV3-27  | IRF9     |
| CCL8     | TRAJ11  | SECTM1  | IGLV3-32  | TRIM22   |
| ELANE    | TRAJ12  | SLURP1  | IGLV3-9   | LANCL1   |
| DEFB103A | TRAJ13  | SPP1    | IGLV4-3   | PPP4C    |
| DEFA3    | TRAJ14  | SST     | IGLV4-60  | HMOX1    |
| DEFA1    | TRAJ15  | STC1    | IGLV4-69  | HMGB1    |
| TMSB10   | TRAJ16  | STC2    | IGLV5-37  | RNASE7   |
| DEFA6    | TRAJ17  | TAC1    | IGLV5-39  | ABCC4    |
| DEFA5    | TRAJ18  | TDGF1   | IGLV5-45  | HGF      |
| DEFA4    | TRAJ19  | TDGF1P3 | IGLV5-48  | HDAC1    |
| LCN2     | TRAJ20  | TG      | IGLV5-52  | IFNLR1   |

|          |         |           |          |          |
|----------|---------|-----------|----------|----------|
| LCN1     | TRAJ21  | TGFA      | IGLV6-57 | PLSCR1   |
| COLEC10  | TRAJ22  | TGFB2     | IGLV7-43 | BACH2    |
| BPI      | TRAJ23  | TGFB3     | IGLV7-46 | TANK     |
| S100A9   | TRAJ24  | THPO      | IGLV8-61 | PIK3CG   |
| S100A8   | TRAJ25  | TNFRSF11B | IGLV9-49 | ARRB1    |
| DCD      | TRAJ26  | TNFSF12   | C3       | RSAD2    |
| LCN6     | TRAJ27  | TNFSF13   | C5       | STAB2    |
| S100A12  | TRAJ28  | TNFSF13B  | CCL3P1   | TBK1     |
| HTN3     | TRAJ29  | TNFSF14   | CKLF     | PDYN     |
| LCN8     | TRAJ30  | TNFSF15   | CMA1     | PDGFRB   |
| DEFA1B   | TRAJ31  | TNFSF18   | CX3CL1   | PDCD1    |
| CCR10    | TRAJ32  | TNFSF8    | CXCL17   | PCSK2    |
| CELA1    | TRAJ33  | TNFSF9    | CCN1     | PCSK1    |
| DEFB106A | TRAJ34  | TOR2A     | EDN1     | ARG2     |
| PENK     | TRAJ35  | TRH       | EDN2     | AQP9     |
| BPIFC    | TRAJ36  | TSHB      | EDN3     | FASLG    |
| MMP12    | TRAJ37  | TSLP      | FGF10    | APOH     |
| BPIFB6   | TRAJ38  | TXLNA     | LECT2    | BIRC5    |
| LEAP2    | TRAJ39  | UCN       | PPBPP1   | ANXA6    |
| SFTPD    | TRAJ40  | UCN2      | PROK2    | IL22     |
| LCN9     | TRAJ41  | UCN3      | SAA1     | VTN      |
| BPIFB2   | TRAJ42  | UTS2      | SAA2     | VIM      |
| PTGDS    | TRAJ43  | UTS2B     | SBDS     | VCAM1    |
| TMSB4X   | TRAJ44  | VEGFB     | SEMA3A   | PRDX1    |
| PGLYRP1  | TRAJ45  | VEGFC     | SEMA3B   | GFAP     |
| ZC3HAV1  | TRAJ46  | VEGF      | SEMA3C   | GBP2     |
| TMSB15A  | TRAJ47  | VIP       | SEMA3D   | ALB      |
| S100B    | TRAJ48  | ACVR1B    | SEMA3E   | SLC29A3  |
| S100A13  | TRAJ49  | ACVR1C    | SEMA3F   | OAS1     |
| S100A6   | TRAJ50  | ACVR2A    | SEMA3G   | AGER     |
| DEFB119  | TRAJ52  | ACVR2B    | SEMA4A   | UNC93B1  |
| DEFB107A | TRAJ53  | ACVRL1    | SEMA4B   | TNFSF4   |
| DEFB105A | TRAJ54  | ADCYAP1R1 | SEMA4C   | NOS1     |
| SERPIND1 | TRAJ56  | ADIPOR1   | SEMA4D   | ACTG1    |
| DEFB129  | TRAJ57  | ADIPOR2   | SEMA4F   | ACTA1    |
| DEFB127  | TRAJ58  | ADRB1     | SEMA4G   | ACO1     |
| S100P    | TRAJ59  | ADRB2     | SEMA5A   | SERPINA3 |
| S100A7   | TRAJ61  | AGTR1     | SEMA5B   | CXCR1    |
| DEFB104A | TRAV1-1 | AGTR2     | SEMA6A   | CCL15    |
| DEFB126  | TRAV1-2 | AMHR2     | SEMA6B   | CCL14    |
| DEFB106B | TRAV2   | ANGPT1    | SEMA6C   | CCL16    |
| DEFB104B | TRAV3   | ANGPT4    | SEMA6D   | CCL19    |
| DEFB107B | TRAV4   | ANGPTL1   | SEMA7A   | CCL18    |
| PGLYRP3  | TRAV5   | ANGPTL2   | SLIT1    | CCL17    |
| PGLYRP2  | TRAV7   | ANGPTL3   | SLIT2    | CCL26    |
| S100A10  | TRAV8-1 | ANGPTL4   | TNC      | CCL22    |

|          |             |         |         |             |
|----------|-------------|---------|---------|-------------|
| S100A2   | TRAV8-2     | ANGPTL6 | TYMP    | CCR3        |
| DEFB125  | TRAV8-3     | APLNR   | C5AR1   | CCL4L1      |
| DEFB123  | TRAV8-4     | AR      | CCR9    | ACKR2       |
| DEFB105B | TRAV8-6     | AVPR1A  | CCRL2   | CCR7        |
| DEFB132  | TRAV8-7     | AVPR1B  | CMKLR1  | CCL27       |
| BPIFB3   | TRAV9-1     | AVPR2   | CX3CR1  | CCR8        |
| LCN12    | TRAV9-2     | BMPR1A  | CXCR3   | ACKR4       |
| PGLYRP4  | TRAV10      | BMPR1B  | CXCR5   | CCL2        |
| S100A11  | TRAV12-1    | BMPR2   | ACKR3   | CCL21       |
| S100A5   | TRAV12-2    | BRD8    | CYSLTR1 | CCL7        |
| S100A3   | TRAV12-3    | C3AR1   | CYSLTR2 | CCL3        |
| S100A1   | TRAV13-1    | CALCR   | ACKR1   | CCL11       |
| DEFB128  | TRAV13-2    | CALCRL  | EDNRA   | CCR5        |
| DEFB108B | TRAV14DV4   | CNTFR   | EDNRB   | CCL23       |
| HTN1     | TRAV16      | CRHR1   | FPR1    | CCL25       |
| LMBR1L   | TRAV17      | CRHR2   | FPR2    | CCL3L3      |
| S100A7A  | TRAV18      | CRIM1   | GPR17   | CCL4L2      |
| DEFB118  | TRAV19      | CRLF1   | GPR32   | CCL3L1      |
| COLEC12  | TRAV20      | CRLF2   | GPR33   | CCR1        |
| TMSB4Y   | TRAV21      | CRLF3   | PTGDR2  | CCL24       |
| DEFB131A | TRAV22      | CSF1R   | C5AR2   | XCL2        |
| DEFB134  | TRAV23DV6   | CSF2RA  | CXCR2   | CXCR4       |
| DEFB130A | TRAV24      | CSF2RB  | LTB4R2  | CXCR6       |
| DEFB124  | TRAV25      | CSF3R   | PLAUR   | CCR4        |
| DEFB121  | TRAV26-1    | EGFR    | PLXNA1  | TAFA5       |
| DEFB116  | TRAV26-2    | ENG     | PLXNA2  | TAFA3       |
| DEFB115  | TRAV27      | EPOR    | PLXNA3  | TAFA4       |
| DEFB114  | TRAV29DV5   | ESR1    | PLXNA4  | TAFA1       |
| DEFB113  | TRAV30      | ESR2    | PLXNB1  | TAFA2       |
| DEFB112  | TRAV34      | ESRRA   | PLXNB2  | CCL15-CCL14 |
| DEFB110  | TRAV35      | ESRRB   | PLXNB3  | PTK2B       |
| TMSB15B  | TRAV36DV7   | ESRRG   | PLXNC1  | IL4         |
| DEFB133  | TRAV38-1    | FGFR1   | PLXND1  | CDH1        |
| S100Z    | TRAV38-2DV8 | FGFR2   | PTAFR   | LTBP1       |
| MAVS     | TRAV39      | FGFR3   | ROBO1   | IL13        |
| TMSB4XP8 | TRAV40      | FGFR4   | ROBO2   | IL10        |
| S100A14  | TRAV41      | FGFRL1  | RXFP3   | IL2         |
| LCN10    | TRBC1       | FLT1    | XCR1    | PPARG       |
| S100A16  | TRBC2       | FLT3    | ADM     | FGR         |
| DEFB136  | TRBD1       | FLT4    | ADM2    | MIF         |
| DEFB135  | TRBD2       | FSHR    | AGRP    | CRP         |
| DEFB117  | TRBJ1-1     | GALR2   | AGT     | JAK2        |
| ZC3HAV1L | TRBJ1-2     | GALR3   | AMBN    | PTK2        |
| S100A7L2 | TRBJ1-3     | GCGR    | AMELX   | PTGDR       |
| MBL3P    | TRBJ1-4     | GHR     | AMH     | CD86        |
| DEFB4B   | TRBJ1-5     | GHRHR   | ANGPTL5 | HCK         |

|          |          |         |         |        |
|----------|----------|---------|---------|--------|
| BPIFB4   | TRBJ1-6  | GHSR    | ANGPTL7 | VDR    |
| IFNAR1   | TRBJ2-1  | GIPR    | APLN    | OLR1   |
| AZU1     | TRBJ2-2  | GLP1R   | AREG    | GRK2   |
| DEFB131B | TRBJ2-3  | GLP2R   | MANF    | TXK    |
| DEFA1A3  | TRBJ2-4  | GNRHR   | CDNF    | RNASE2 |
| LCN1P1   | TRBJ2-5  | GPER1   | ARTN    | CD79A  |
| S100G    | TRBJ2-6  | HNF4A   | AVP     | CD79B  |
| DEFA7P   | TRBJ2-7  | HNF4G   | BDNF    | LYN    |
| DEFB130B | TRBV2    | HTR3A   | BMP1    | SYK    |
| DEFB108F | TRBV3-1  | HTR3B   | BMP10   | BTK    |
| DEFB131C | TRBV4-1  | HTR3C   | BMP15   | BLNK   |
| TCHHL1   | TRBV4-2  | HTR3D   | BMP2    | VAV3   |
| TINAGL1  | TRBV4-3  | HTR3E   | BMP3    | VAV1   |
| IFNGR1   | TRBV5-1  | IFNGR2  | BMP4    | VAV2   |
| SLC22A17 | TRBV5-4  | IGF1R   | BMP5    | RAC1   |
| WFIKKN1  | TRBV5-5  | IGF2R   | BMP6    | RAC2   |
| WFDC2    | TRBV5-6  | IL10RA  | BMP7    | RAC3   |
| IL6      | TRBV5-7  | IL10RB  | BMP8A   | PPP3CA |
| UMODL1   | TRBV5-8  | IL11RA  | BMP8B   | PPP3CB |
| TGFB1    | TRBV6-1  | IL12RB1 | BTC     | PPP3CC |
| PF4V1    | TRBV6-2  | IL12RB2 | MYDGF   | CHP1   |
| MMP9     | TRBV6-3  | IL13RA1 | CALCA   | PPP3R1 |
| ANOS1    | TRBV6-4  | IL13RA2 | CALCB   | PPP3R2 |
| TLR4     | TRBV6-5  | IL15RA  | CAT     | CHP2   |
| SPAG11B  | TRBV6-6  | IL2RB   | CCK     | NFAT5  |
| A2M      | TRBV6-7  | IL17RA  | CD320   | NFATC1 |
| NFKB1    | TRBV6-8  | IL17RB  | CD70    | NFATC2 |
| APOBEC3G | TRBV6-9  | IL17RC  | ADA2    | NFATC3 |
| FABP6    | TRBV7-2  | IL17RD  | CER1    | NFATC4 |
| NOD2     | TRBV7-3  | IL17RE  | CGA     | HRAS   |
| MBL2     | TRBV7-4  | IL18R1  | CGB3    | KRAS   |
| SFTPA1   | TRBV7-6  | IL18RAP | CGB1    | NRAS   |
| RBP1     | TRBV7-7  | IL1R1   | CGB2    | FOS    |
| TLR2     | TRBV7-8  | IL1R2   | CGB5    | CARD11 |
| SLC40A1  | TRBV7-9  | IL1RAP  | CGB7    | BCL10  |
| PLAU     | TRBV9    | IL1RL1  | CGB8    | MALT1  |
| IL1B     | TRBV10-1 | IL1RL2  | CHGA    | CHUK   |
| PAEP     | TRBV10-2 | IL20RA  | CHGB    | IKBKB  |
| HJV      | TRBV10-3 | IL20RB  | CLCF1   | IKBKG  |
| MUC5AC   | TRBV11-1 | IL21R   | CLEC11A | NFKBIA |
| OBP2A    | TRBV11-2 | IL22RA1 | CMTM1   | NFKBIB |
| PLTP     | TRBV11-3 | IL22RA2 | CMTM2   | NFKBIE |
| MX1      | TRBV12-3 | IL23R   | CMTM3   | CD19   |
| DDX58    | TRBV12-4 | IL27RA  | CMTM4   | CR2    |
| IFNL1    | TRBV12-5 | IL2RA   | CMTM5   | PIK3R5 |
| IRF3     | TRBV13   | IL2RG   | CMTM6   | PIK3R1 |



|         |          |        |       |          |
|---------|----------|--------|-------|----------|
| SFTPA2  | TRBV14   | IL31RA | CMTM7 | PIK3R2   |
| LPA     | TRBV15   | IL3RA  | CMTM8 | PIK3R3   |
| LBP     | TRBV16   | IL4R   | CNTF  | PIK3CA   |
| RBP4    | TRBV17   | IL5RA  | CORT  | PIK3CB   |
| NOX4    | TRBV18   | IL6R   | CRH   | PIK3CD   |
| LTF     | TRBV19   | IL9R   | CSF1  | AKT3     |
| IFNB1   | TRBV20-1 | INSR   | CSF2  | AKT1     |
| RBP5    | TRBV24-1 | KDR    | CSF3  | AKT2     |
| FABP7   | TRBV25-1 | LEPR   | CSH1  | GSK3B    |
| FABP5   | TRBV27   | LGR4   | CSH2  | INPP5D   |
| FABP3   | TRBV28   | LGR5   | CSHL1 | CD22     |
| FABP2   | TRBV29-1 | LGR6   | CSPG5 | CD72     |
| FABP4   | TRBV30   | LHCGR  | CTF1  | PTPN6    |
| R3HDML  | TRDC     | LIFR   | CCN2  | LILRB3   |
| BPIFA3  | TRDD1    | LTBR   | DKK1  | FCGR2B   |
| BPIFB1  | TRDD2    | MC1R   | EBI3  | RASGRP3  |
| OASL    | TRDD3    | MC2R   | EGF   | PLCG2    |
| CRABP2  | TRDJ1    | MC3R   | EPGN  | PRKCB    |
| CRABP1  | TRDJ2    | MC4R   | EPO   | IFITM1   |
| RBP7    | TRDJ3    | MCHR1  | EREG  | IGH      |
| DUOX1   | TRDJ4    | MCHR2  | ESM1  | IGHA1    |
| OBP2B   | TRDV1    | MET    | FAM3B | IGHA2    |
| RBP2    | TRDV2    | MLNR   | FAM3C | IGHD     |
| LCN15   | TRDV3    | MPL    | FAM3D | IGHD1-1  |
| CETP    | TRGV9    | MTNR1A | FGF1  | IGHD1-14 |
| FABP12  | TRGV8    | MTNR1B | FGF11 | IGHD1-20 |
| FABP9   | TRGV5    | NGFR   | FGF12 | IGHD1-26 |
| BPIFA1  | TRGV4    | NMBR   | FGF13 | IGHD1-7  |
| LCNL1   | TRGV3    | NPR1   | FGF14 | IGHD2-15 |
| C8G     | TRGV2    | NPR3   | FGF16 | IGHD2-2  |
| SPAG11A | TRGJP2   | NR0B1  | FGF17 | IGHD2-21 |
| PII5    | TRGJP1   | NR0B2  | FGF18 | IGHD2-8  |
| NOX1    | TRGJP    | NR1D1  | FGF19 | IGHD3-10 |
| PMP2    | TRGJ2    | NR1D2  | FGF20 | IGHD3-16 |
| APOD    | TRGJ1    | NR1H2  | FGF21 | IGHD3-22 |
| ORM2    | TRGC2    | NR1H3  | FGF22 | IGHD3-3  |
| ORM1    | TRGC1    | NR1H4  | FGF23 | IGHD3-9  |
| TNF     | TRAV6    | NR1I2  | FGF3  | IGHD4-11 |
| CTSG    | PRTN3    | MAPK1  |       |          |

Supplementary Table 2: Differentially expressed genes (DEGs) between DN patients and controls in GSE30528

| Tag      | logFC      | AveExpr    | t          | P.Value  | adj.P.Val | B          |
|----------|------------|------------|------------|----------|-----------|------------|
| ZNF415   | -1.5986726 | -0.3290002 | -11.280424 | 7.46E-11 | 8.57E-07  | 14.839326  |
| LOX      | -2.0651729 | -0.4592303 | -10.774832 | 1.82E-10 | 8.57E-07  | 14.0007061 |
| CA10     | -2.546763  | -0.6837071 | -10.639418 | 2.33E-10 | 8.57E-07  | 13.7705575 |
| TRAM2    | -1.774324  | -0.1749566 | -10.414123 | 3.51E-10 | 8.57E-07  | 13.3823512 |
| ARHGAP19 | -2.3046172 | -0.6114305 | -10.231156 | 4.93E-10 | 8.57E-07  | 13.0621448 |
| FYN      | -1.6632815 | -0.3436198 | -10.228263 | 4.95E-10 | 8.57E-07  | 13.0570453 |
| MPP5     | -1.658312  | -0.3788755 | -10.194382 | 5.28E-10 | 8.57E-07  | 12.9972477 |
| PARVA    | -1.1805984 | -0.2178328 | -10.093118 | 6.38E-10 | 8.57E-07  | 12.8176038 |
| TCF7L1   | -2.1805335 | -0.4445923 | -10.043323 | 7.00E-10 | 8.57E-07  | 12.72876   |
| C1orf21  | -2.1294061 | -0.2490786 | -9.9675928 | 8.08E-10 | 8.57E-07  | 12.5929961 |
| NPHS1    | -2.9627307 | -0.7915856 | -9.963485  | 8.14E-10 | 8.57E-07  | 12.5856096 |
| ZNF185   | -2.3357588 | -0.5599117 | -9.9453711 | 8.43E-10 | 8.57E-07  | 12.5530106 |
| FERMT2   | -1.0892783 | -0.1739411 | -9.9012227 | 9.16E-10 | 8.65E-07  | 12.4733706 |
| LGALS8   | -1.5637274 | -0.2701227 | -9.7939781 | 1.12E-09 | 9.91E-07  | 12.2787985 |
| SLC31A2  | -1.444234  | -0.1990275 | -9.7020037 | 1.34E-09 | 1.10E-06  | 12.1106701 |
| CCDC91   | -1.867353  | -0.4253402 | -9.6733113 | 1.42E-09 | 1.10E-06  | 12.0579815 |
| B3GALT2  | -2.6796018 | -0.4038344 | -9.4937903 | 2.01E-09 | 1.47E-06  | 11.725724  |
| PRKAR2B  | -3.0161065 | -0.9710511 | -9.4669475 | 2.12E-09 | 1.47E-06  | 11.6756568 |
| WBP5     | -1.051291  | -0.1451292 | -9.4351888 | 2.25E-09 | 1.49E-06  | 11.6162899 |
| PLCE1    | -2.2869932 | -0.6422848 | -9.3019514 | 2.92E-09 | 1.82E-06  | 11.3656826 |
| TGFBR3   | -2.2503654 | -0.3984462 | -9.2843623 | 3.03E-09 | 1.82E-06  | 11.3324122 |
| KLF7     | -2.093725  | -0.2960212 | -9.2361997 | 3.33E-09 | 1.90E-06  | 11.2410866 |
| C2orf68  | -1.058473  | -0.1808399 | -9.1947421 | 3.62E-09 | 1.90E-06  | 11.1622119 |
| RABL3    | -1.1194637 | -0.2761924 | -9.1900235 | 3.65E-09 | 1.90E-06  | 11.153219  |
| FBXL7    | -1.7178403 | -0.1083982 | -9.1784561 | 3.74E-09 | 1.90E-06  | 11.1311603 |
| CERS6    | -1.6159434 | -0.2195375 | -9.0840266 | 4.51E-09 | 2.21E-06  | 10.9503743 |
| MAGI2    | -2.8778895 | -0.4174257 | -9.0426381 | 4.90E-09 | 2.31E-06  | 10.8707352 |
| F5       | -2.0162157 | -0.385724  | -9.0226453 | 5.10E-09 | 2.32E-06  | 10.8321777 |
| CORO2B   | -2.0449628 | -0.3323154 | -9.0067275 | 5.27E-09 | 2.32E-06  | 10.8014383 |
| DACH1    | -2.2269363 | -0.2627997 | -8.9837843 | 5.52E-09 | 2.35E-06  | 10.7570683 |
| SEMA5A   | -1.9923736 | -0.3790724 | -8.8746148 | 6.88E-09 | 2.84E-06  | 10.5449111 |
| TNS3     | -1.0393233 | -0.130007  | -8.8195227 | 7.70E-09 | 3.08E-06  | 10.4371971 |
| DPYSL3   | -1.4088547 | -0.2462567 | -8.7701406 | 8.51E-09 | 3.31E-06  | 10.340276  |
| DPP6     | -2.8181472 | -0.76005   | -8.6840513 | 1.02E-08 | 3.84E-06  | 10.17047   |
| LEPREL1  | -1.3774174 | -0.2284875 | -8.6358859 | 1.12E-08 | 4.12E-06  | 10.075     |
| TJP1     | -1.3678624 | -0.325802  | -8.4607363 | 1.61E-08 | 5.61E-06  | 9.7250023  |
| SGCE     | -1.3272186 | -0.2346023 | -8.3860366 | 1.88E-08 | 6.23E-06  | 9.57437935 |
| USP46    | -1.2620467 | -0.2486659 | -8.3655032 | 1.97E-08 | 6.34E-06  | 9.53283462 |
| CXADR    | -1.6864874 | -0.2417628 | -8.291786  | 2.30E-08 | 7.23E-06  | 9.3831797  |
| FANCL    | -1.3769465 | -0.3709001 | -8.2500867 | 2.51E-08 | 7.53E-06  | 9.29817597 |
| ZNF211   | -1.1402794 | -0.11871   | -8.2318217 | 2.61E-08 | 7.66E-06  | 9.26086331 |
| C1QA     | 1.92227621 | 0.0965512  | 8.21967328 | 2.67E-08 | 7.69E-06  | 9.23601921 |
| SULF1    | -1.9634948 | -0.375712  | -8.190406  | 2.85E-08 | 7.89E-06  | 9.17607802 |
| GJA1     | -1.9385544 | -0.275716  | -8.1675904 | 2.99E-08 | 8.06E-06  | 9.12926422 |
| ARMCX1   | -1.0660469 | -0.1271784 | -8.1454256 | 3.13E-08 | 8.08E-06  | 9.08371336 |

|           |            |            |            |          |          |            |
|-----------|------------|------------|------------|----------|----------|------------|
| LOC728392 | -1.9527209 | -0.4861754 | -8.1443447 | 3.14E-08 | 8.08E-06 | 9.08149016 |
| TACC2     | -1.38809   | -0.2614089 | -8.138318  | 3.18E-08 | 8.08E-06 | 9.0690913  |
| KLK6      | -2.5896216 | -0.4812422 | -8.1084673 | 3.39E-08 | 8.45E-06 | 9.00760167 |
| ANKRD28   | -1.2224306 | -0.2093061 | -8.0622606 | 3.74E-08 | 8.70E-06 | 8.91216551 |
| TSPYL4    | -1.0865148 | -0.1000418 | -8.0530335 | 3.81E-08 | 8.70E-06 | 8.89307049 |
| GTF2A2    | -1.2940725 | -0.1284476 | -8.0526338 | 3.82E-08 | 8.70E-06 | 8.89224314 |
| BTG3      | -1.094967  | -0.2387443 | -8.040718  | 3.91E-08 | 8.77E-06 | 8.86756508 |
| CITED2    | -1.1636136 | -0.0704749 | -7.9663747 | 4.59E-08 | 9.95E-06 | 8.71313348 |
| TNNT2     | -3.2378439 | -0.7332161 | -7.9305078 | 4.96E-08 | 1.06E-05 | 8.63834175 |
| PDPN      | -1.1076364 | -0.2891511 | -7.9206349 | 5.07E-08 | 1.06E-05 | 8.61772149 |
| B3GNT1    | -1.1907673 | -0.2996584 | -7.9148853 | 5.13E-08 | 1.06E-05 | 8.60570662 |
| PVRL2     | -1.2945581 | -0.1790137 | -7.9059098 | 5.23E-08 | 1.06E-05 | 8.58694113 |
| POGLUT1   | -1.095571  | -0.1485516 | -7.8948165 | 5.36E-08 | 1.07E-05 | 8.56373149 |
| ARRB1     | -1.2229468 | -0.2218707 | -7.8059896 | 6.49E-08 | 1.27E-05 | 8.37724615 |
| NRIP2     | -1.7420059 | -0.4445742 | -7.8029064 | 6.54E-08 | 1.27E-05 | 8.37075269 |
| EFEMP1    | -1.0773434 | -0.1394476 | -7.7728839 | 6.98E-08 | 1.34E-05 | 8.30745204 |
| LRRC2     | -3.1681071 | -1.1157013 | -7.760591  | 7.17E-08 | 1.35E-05 | 8.28149568 |
| KBTBD11   | -1.5450984 | -0.2504599 | -7.7103189 | 8.00E-08 | 1.48E-05 | 8.17512052 |
| H2AFJ     | -2.109432  | -0.3022961 | -7.707857  | 8.04E-08 | 1.48E-05 | 8.16990201 |
| CHI3L1    | -2.6956437 | -0.5540163 | -7.6847997 | 8.46E-08 | 1.53E-05 | 8.12098343 |
| SYBU      | -1.078144  | -0.1754207 | -7.6541098 | 9.04E-08 | 1.61E-05 | 8.05575296 |
| THSD7A    | -2.3792741 | -0.4066957 | -7.5868625 | 1.05E-07 | 1.77E-05 | 7.91234958 |
| SYNPO     | -2.5101104 | -0.6635832 | -7.5821227 | 1.06E-07 | 1.77E-05 | 7.90221754 |
| F2R       | -1.9204716 | -0.2826073 | -7.5668086 | 1.10E-07 | 1.81E-05 | 7.86945994 |
| ZNF274    | -1.0315548 | -0.1247327 | -7.5437728 | 1.15E-07 | 1.88E-05 | 7.82012204 |
| CRYZL1    | -1.0044512 | -0.1422515 | -7.5008825 | 1.27E-07 | 2.04E-05 | 7.72805851 |
| FRY       | -1.7491735 | -0.3663552 | -7.4836625 | 1.32E-07 | 2.07E-05 | 7.69102245 |
| VEGFA     | -1.6025525 | -0.1649998 | -7.462826  | 1.38E-07 | 2.13E-05 | 7.64615164 |
| ZFPM2     | -1.5083578 | -0.1910163 | -7.4264253 | 1.49E-07 | 2.27E-05 | 7.56761644 |
| NFE2L3    | -1.2770626 | -0.0656422 | -7.3803735 | 1.66E-07 | 2.43E-05 | 7.46799054 |
| STXBP1    | -1.4223106 | -0.0254016 | -7.3540638 | 1.76E-07 | 2.55E-05 | 7.41093912 |
| ZDHHC6    | -2.2559674 | -0.6004896 | -7.3216155 | 1.89E-07 | 2.64E-05 | 7.34044255 |
| TCF21     | -2.5397624 | -0.6237804 | -7.3198218 | 1.90E-07 | 2.64E-05 | 7.3365412  |
| FOXD1     | -1.4473853 | -0.1947619 | -7.3119111 | 1.93E-07 | 2.65E-05 | 7.3193301  |
| NEK7      | -1.203051  | -0.3109282 | -7.3076764 | 1.95E-07 | 2.65E-05 | 7.31011332 |
| ST3GAL6   | -1.2347834 | -0.3296892 | -7.2840141 | 2.05E-07 | 2.77E-05 | 7.25856551 |
| ARHGEF3   | -1.7952895 | -0.4074154 | -7.2388635 | 2.27E-07 | 3.01E-05 | 7.15998914 |
| FAM65A    | -1.9252052 | -0.4626463 | -7.237566  | 2.28E-07 | 3.01E-05 | 7.15715202 |
| CTNNBIP1  | -1.5055058 | -0.2682782 | -7.2032669 | 2.46E-07 | 3.16E-05 | 7.08207139 |
| CD200     | -1.3071363 | -0.3043782 | -7.1951064 | 2.51E-07 | 3.19E-05 | 7.06418405 |
| MCM6      | -1.6441966 | -0.4715529 | -7.1734727 | 2.63E-07 | 3.31E-05 | 7.01671941 |
| KLHL3     | -1.1155445 | -0.0970715 | -7.1418201 | 2.83E-07 | 3.49E-05 | 6.94715667 |
| MXRA8     | -1.6808233 | -0.3805652 | -7.1278335 | 2.92E-07 | 3.55E-05 | 6.9163741  |
| ANXA2P2   | -1.2567208 | -0.3421383 | -7.1269579 | 2.92E-07 | 3.55E-05 | 6.91444613 |
| SERPINE2  | 1.76349739 | 0.27504734 | 7.0997575  | 3.11E-07 | 3.74E-05 | 6.85450187 |
| SRGAP2    | -2.4757559 | -0.5260944 | -7.0803826 | 3.25E-07 | 3.84E-05 | 6.81174153 |
| STON1     | -1.5353735 | -0.2350216 | -7.0780812 | 3.27E-07 | 3.84E-05 | 6.80665878 |

|          |            |            |            |          |            |            |
|----------|------------|------------|------------|----------|------------|------------|
| BCAR3    | -1.3601555 | -0.2849656 | -7.0762098 | 3.28E-07 | 3.84E-05   | 6.80252523 |
| GPRC5A   | -1.9484283 | -0.2524982 | -7.0507822 | 3.48E-07 | 4.00E-05   | 6.746314   |
| NEBL     | -1.6844617 | -0.4529073 | -7.0409518 | 3.55E-07 | 4.05E-05   | 6.7245589  |
| TSPYL5   | -1.2231824 | -0.1481022 | -7.0337281 | 3.61E-07 | 4.08E-05   | 6.70856416 |
| C1QB     | 2.20468584 | 0.35690211 | 7.01237914 | 3.79E-07 | 4.21E-05   | 6.66125141 |
| FAM134B  | -1.1578196 | -0.106185  | -7.003907  | 3.87E-07 | 4.26E-05   | 6.64245867 |
| KAT2B    | -1.1071478 | -0.2181679 | -6.994904  | 3.95E-07 | 4.31E-05   | 6.62247773 |
| ZNF423   | -1.2947601 | -0.2429007 | -6.9775954 | 4.11E-07 | 4.38E-05   | 6.58403267 |
| ADRA2A   | 1.00658882 | 0.19767046 | 6.95359919 | 4.34E-07 | 4.58E-05   | 6.53066639 |
| SPOCK2   | -1.6263889 | -0.2565233 | -6.9502946 | 4.37E-07 | 4.58E-05   | 6.52331107 |
| FGF9     | -1.6281765 | -0.0964357 | -6.9382346 | 4.49E-07 | 4.68E-05   | 6.49645558 |
| NDN      | -1.3530565 | -0.3596313 | -6.9291031 | 4.59E-07 | 4.74E-05   | 6.47610846 |
| NAP1L2   | -1.0936865 | -0.011659  | -6.9102132 | 4.79E-07 | 4.87E-05   | 6.43398157 |
| EXPH5    | -1.2642618 | -0.1625066 | -6.8584232 | 5.39E-07 | 5.25E-05   | 6.31823839 |
| CDC42EP3 | -1.6830796 | -0.3635719 | -6.8556253 | 5.43E-07 | 5.25E-05   | 6.31197522 |
| CETN3    | -1.1241393 | -0.0776251 | -6.8548964 | 5.44E-07 | 5.25E-05   | 6.31034346 |
| OLFML3   | 1.19149377 | -0.0317514 | 6.8395562  | 5.63E-07 | 5.39E-05   | 6.27598452 |
| ELOVL4   | -1.8618748 | -0.306076  | -6.8347222 | 5.69E-07 | 5.42E-05   | 6.26515086 |
| NTNG1    | -1.8800007 | -0.3713381 | -6.7869281 | 6.36E-07 | 5.96E-05   | 6.15787182 |
| UGGT2    | -1.0671353 | 0.05366096 | -6.7252842 | 7.33E-07 | 6.73E-05   | 6.01906245 |
| TMPRSS4  | 1.0107313  | 0.05256907 | 6.68560119 | 8.03E-07 | 7.32E-05   | 5.92944279 |
| ITGB5    | -1.0004175 | -0.0771568 | -6.6712358 | 8.31E-07 | 7.52E-05   | 5.89694993 |
| MYO1E    | -1.2005965 | -0.2171461 | -6.6601967 | 8.52E-07 | 7.66E-05   | 5.87196283 |
| HPS5     | -1.8177195 | -0.1154081 | -6.6544378 | 8.64E-07 | 7.71E-05   | 5.85892117 |
| WT1-AS   | -1.8650916 | -0.3580571 | -6.641269  | 8.90E-07 | 7.85E-05   | 5.82908329 |
| RNASE6   | 1.42007243 | 0.25941784 | 6.63834942 | 8.97E-07 | 7.85E-05   | 5.82246506 |
| ITGA3    | -1.2984401 | -0.1963111 | -6.6043882 | 9.70E-07 | 8.28E-05   | 5.74540055 |
| MYO5C    | -1.4259962 | -0.2504772 | -6.6038871 | 9.71E-07 | 8.28E-05   | 5.74426236 |
| MYOZ2    | -1.3517529 | -0.0631106 | -6.5976342 | 9.86E-07 | 8.35E-05   | 5.73005703 |
| FAM98A   | -1.2232518 | -0.1232258 | -6.5602697 | 1.08E-06 | 8.94E-05   | 5.64506901 |
| RAI14    | -1.1855824 | -0.3354873 | -6.5555798 | 1.09E-06 | 8.98E-05   | 5.63438893 |
| ANKMY2   | -1.1020475 | -0.2018783 | -6.5376035 | 1.13E-06 | 9.25E-05   | 5.59342754 |
| SOBP     | -1.2833935 | -0.2640546 | -6.5246358 | 1.17E-06 | 9.47E-05   | 5.56385357 |
| DCN      | -1.4487254 | -0.2343692 | -6.5194387 | 1.18E-06 | 9.47E-05   | 5.55199542 |
| MAFB     | -1.9384252 | -0.5233065 | -6.5171393 | 1.19E-06 | 9.47E-05   | 5.54674771 |
| TENC1    | -1.3547252 | -0.2454762 | -6.5155117 | 1.19E-06 | 9.47E-05   | 5.54303292 |
| LPL      | -2.6823938 | -0.2046276 | -6.5079373 | 1.22E-06 | 9.50E-05   | 5.52574061 |
| FAM20B   | -1.0278044 | -0.0566268 | -6.5044073 | 1.23E-06 | 9.53E-05   | 5.51767924 |
| UBAP2    | -1.0810256 | -0.2202029 | -6.4661958 | 1.34E-06 | 0.00010238 | 5.43031738 |
| MGAT5    | -1.2214274 | -0.2853956 | -6.4586526 | 1.36E-06 | 0.00010361 | 5.41305044 |
| KLK7     | -2.1131342 | -0.318279  | -6.426176  | 1.47E-06 | 0.0001093  | 5.33862915 |
| SEMA3G   | -2.7058661 | -0.5929961 | -6.4164698 | 1.51E-06 | 0.0001112  | 5.316362   |
| CD163    | 1.24549578 | 0.18483883 | 6.40630119 | 1.54E-06 | 0.00011325 | 5.29302183 |
| BST1     | -1.0443787 | -0.0455858 | -6.3774499 | 1.65E-06 | 0.00011857 | 5.22673101 |
| NR3C2    | -1.015504  | -0.1066248 | -6.3646064 | 1.70E-06 | 0.0001209  | 5.19718852 |
| MME      | -1.515839  | -0.3301851 | -6.3514219 | 1.75E-06 | 0.00012405 | 5.16684126 |
| FOXC1    | -1.6290318 | -0.5305362 | -6.3120316 | 1.93E-06 | 0.0001347  | 5.07605188 |

|              |            |            |            |          |            |            |
|--------------|------------|------------|------------|----------|------------|------------|
| TPPP3        | -2.7827755 | -0.2859609 | -6.2787298 | 2.08E-06 | 0.00014496 | 4.99915274 |
| IQGAP2       | -1.3344296 | -0.345759  | -6.2639911 | 2.16E-06 | 0.00014932 | 4.96507745 |
| WT1          | -1.4419256 | -0.3248188 | -6.2514247 | 2.22E-06 | 0.00015303 | 4.9360043  |
| FN1          | 1.07405918 | -0.0681225 | 6.23893226 | 2.29E-06 | 0.00015601 | 4.90708435 |
| CREB3L2      | -1.2289073 | -0.1100962 | -6.2328975 | 2.32E-06 | 0.00015604 | 4.89310737 |
| HTRA1        | -1.8646912 | -0.5461017 | -6.2323843 | 2.33E-06 | 0.00015604 | 4.89191867 |
| FAM114A1     | -1.2937789 | -0.3900427 | -6.2279016 | 2.35E-06 | 0.00015663 | 4.88153338 |
| NFASC        | -1.5637639 | -0.2289676 | -6.2265293 | 2.36E-06 | 0.00015663 | 4.87835371 |
| ZNF804A      | -2.2549059 | -0.0795392 | -6.2195059 | 2.40E-06 | 0.00015722 | 4.86207671 |
| CDKN1C       | -2.0137817 | -0.3251795 | -6.2151851 | 2.42E-06 | 0.00015722 | 4.85206021 |
| RASL11B      | -2.0589233 | -0.5174132 | -6.212784  | 2.44E-06 | 0.00015722 | 4.84649295 |
| PLA2R1       | -2.2389074 | -0.5604581 | -6.2124162 | 2.44E-06 | 0.00015722 | 4.84564015 |
| RASGRP3      | -1.6743815 | -0.3116248 | -6.1919552 | 2.56E-06 | 0.00016267 | 4.79817216 |
| COLGALT2     | -1.6848418 | -0.1538757 | -6.1824079 | 2.62E-06 | 0.00016561 | 4.77600684 |
| JAM3         | -1.6092456 | -0.0269559 | -6.1777399 | 2.65E-06 | 0.00016587 | 4.76516554 |
| AIF1         | -1.2276807 | -0.303977  | -6.1683777 | 2.71E-06 | 0.0001688  | 4.7434151  |
| CD1C         | 1.17860658 | 0.35704327 | 6.16542529 | 2.73E-06 | 0.00016919 | 4.73655389 |
| GHR          | -1.8007286 | -0.2825092 | -6.1310111 | 2.96E-06 | 0.00018014 | 4.65650595 |
| SHROOM2      | -1.0312224 | -0.0902465 | -6.1293655 | 2.97E-06 | 0.00018014 | 4.65267494 |
| TRIB2        | -1.3752968 | -0.1324355 | -6.1272278 | 2.99E-06 | 0.00018023 | 4.6476978  |
| CLIP3        | -1.452002  | -0.23525   | -6.1091769 | 3.12E-06 | 0.00018561 | 4.60565109 |
| HIVEP2       | -1.0997168 | -0.0780266 | -6.1026722 | 3.17E-06 | 0.00018683 | 4.59049046 |
| MIR6872      | -1.5884301 | -0.2585997 | -6.0793747 | 3.35E-06 | 0.00019405 | 4.53615294 |
| LOC101928916 | 2.47333878 | 0.60165554 | 6.07645538 | 3.37E-06 | 0.00019456 | 4.52933989 |
| PALLD        | -1.0262244 | -0.022879  | -6.0732719 | 3.40E-06 | 0.00019519 | 4.52190927 |
| NXN          | -1.1331308 | -0.240717  | -6.055449  | 3.54E-06 | 0.00020106 | 4.48028871 |
| CPEB1        | -1.0390146 | -0.0328456 | -6.0348652 | 3.72E-06 | 0.00020941 | 4.43217799 |
| ZNF91        | -2.1692494 | -0.0323917 | -6.0221092 | 3.84E-06 | 0.00021229 | 4.40234054 |
| NES          | -2.515546  | -0.614747  | -6.0046596 | 4.00E-06 | 0.00021793 | 4.36149638 |
| HS3ST3A1     | -2.1961194 | -0.4599414 | -6.0042524 | 4.01E-06 | 0.00021793 | 4.36054286 |
| C8orf33      | -1.3879493 | -0.255005  | -5.9947195 | 4.10E-06 | 0.00022205 | 4.33821542 |
| CAND2        | -1.5464413 | -0.2605597 | -5.9856806 | 4.19E-06 | 0.00022408 | 4.31703603 |
| SPOCK1       | -2.7240241 | -0.5912368 | -5.9804294 | 4.24E-06 | 0.00022508 | 4.30472774 |
| TSPAN2       | -1.879761  | -0.4418559 | -5.9611842 | 4.44E-06 | 0.00023118 | 4.25959464 |
| BZW2         | 1.03733453 | 0.17160782 | 5.93599875 | 4.72E-06 | 0.00024086 | 4.20047297 |
| VSIG4        | 1.5766574  | 0.1186712  | 5.93101701 | 4.78E-06 | 0.00024232 | 4.18877085 |
| AMIGO2       | -2.1694347 | -0.5753579 | -5.9302952 | 4.78E-06 | 0.00024232 | 4.18707517 |
| EMP2         | -1.3693191 | 0.00925292 | -5.9214736 | 4.89E-06 | 0.0002447  | 4.16634622 |
| PEA15        | -1.098688  | -0.074024  | -5.9108858 | 5.01E-06 | 0.00024913 | 4.14145684 |
| ZNF124       | -1.6718593 | -0.2218831 | -5.9046136 | 5.09E-06 | 0.00025197 | 4.12670689 |
| SERPINA3     | 2.32210552 | 0.4780048  | 5.89421188 | 5.22E-06 | 0.00025739 | 4.10223738 |
| NEDD9        | -1.0196714 | -0.0783763 | -5.8843267 | 5.34E-06 | 0.00025985 | 4.07897279 |
| CLDN5        | -1.7580211 | -0.4886488 | -5.8825914 | 5.37E-06 | 0.00025985 | 4.0748878  |
| CLEC10A      | 1.00523381 | 0.25621533 | 5.86706811 | 5.57E-06 | 0.00026491 | 4.03833187 |
| MXRA7        | -1.1375239 | -0.2371653 | -5.8646037 | 5.60E-06 | 0.00026553 | 4.03252617 |
| ETS2         | -1.2463371 | 0.03779188 | -5.8592526 | 5.68E-06 | 0.00026802 | 4.01991795 |
| TRIM16       | 1.00364944 | 0.1914916  | 5.84366053 | 5.89E-06 | 0.00027632 | 3.98316408 |

|           |            |            |            |          |            |            |
|-----------|------------|------------|------------|----------|------------|------------|
| MYLIP     | -1.5838634 | -0.0123137 | -5.8260977 | 6.15E-06 | 0.00028525 | 3.94173627 |
| MS4A6A    | 1.86903737 | 0.37863814 | 5.81914192 | 6.25E-06 | 0.00028907 | 3.92532044 |
| LCK       | 1.07460747 | 0.20354494 | 5.80572812 | 6.46E-06 | 0.00029549 | 3.89365039 |
| SEC14L1   | -1.0698715 | -0.0482067 | -5.7912306 | 6.69E-06 | 0.00030393 | 3.85940222 |
| PDLIM2    | -1.503455  | -0.2838953 | -5.7835943 | 6.82E-06 | 0.00030854 | 3.84135468 |
| LHFP      | -1.1421861 | -0.0730113 | -5.7729927 | 6.99E-06 | 0.0003144  | 3.81628992 |
| TCEAL2    | -2.1919143 | -0.5582009 | -5.7578358 | 7.25E-06 | 0.00032505 | 3.78043697 |
| F3        | -2.1499359 | -0.5686988 | -5.7516152 | 7.36E-06 | 0.00032776 | 3.76571621 |
| OLFML2A   | -1.4626382 | 0.17278854 | -5.7126004 | 8.09E-06 | 0.00035667 | 3.67330814 |
| GPNMB     | -1.3355528 | -0.1246857 | -5.6889139 | 8.57E-06 | 0.00037404 | 3.61713852 |
| MED4      | -1.0814342 | -0.0735774 | -5.6787761 | 8.79E-06 | 0.0003796  | 3.59308262 |
| PTGDS     | -2.7357886 | -0.8640205 | -5.6340371 | 9.80E-06 | 0.00041376 | 3.48681397 |
| OBFC1     | -1.2397819 | 0.06260228 | -5.6162122 | 1.02E-05 | 0.00042398 | 3.4444264  |
| NAP1L3    | -1.2717976 | -0.055533  | -5.5946249 | 1.08E-05 | 0.00044134 | 3.39305565 |
| GCNT3     | 1.08908462 | 0.20308236 | 5.57982161 | 1.12E-05 | 0.00045614 | 3.35780627 |
| ATP10A    | -1.4062108 | -0.3223244 | -5.5723003 | 1.14E-05 | 0.00046316 | 3.33988964 |
| LOC730101 | -1.360869  | -0.1993004 | -5.5673322 | 1.15E-05 | 0.00046663 | 3.32805257 |
| SASH3     | 1.0676222  | 0.20498586 | 5.55821788 | 1.18E-05 | 0.00047352 | 3.30633137 |
| FKBP9     | -1.0185608 | -0.0219957 | -5.5475713 | 1.21E-05 | 0.00048304 | 3.28094993 |
| IFIT1     | -1.0942167 | -0.1735243 | -5.5317745 | 1.26E-05 | 0.00049691 | 3.24327377 |
| PCMTD2    | -1.2335187 | -0.2034356 | -5.5296401 | 1.26E-05 | 0.00049715 | 3.23818157 |
| CR1       | -1.0556837 | -0.1933686 | -5.512531  | 1.32E-05 | 0.00051531 | 3.19735014 |
| BEX4      | -1.140057  | -0.1501772 | -5.506477  | 1.34E-05 | 0.00051904 | 3.18289669 |
| SLK       | -1.3912386 | -0.2362983 | -5.4997069 | 1.36E-05 | 0.00052161 | 3.16672998 |
| MOXD1     | 1.90556198 | 0.4893945  | 5.49917482 | 1.36E-05 | 0.00052161 | 3.16545932 |
| SNCA      | -1.442806  | -0.0466317 | -5.4670427 | 1.47E-05 | 0.00055781 | 3.08868074 |
| NME7      | -1.2369118 | -0.1809513 | -5.4635171 | 1.49E-05 | 0.00056103 | 3.08025177 |
| ZBTB10    | -1.074309  | 0.07401408 | -5.4616478 | 1.49E-05 | 0.000562   | 3.0757822  |
| TPM2      | -1.0184652 | -0.1090073 | -5.4562552 | 1.51E-05 | 0.00056624 | 3.062887   |
| COL1A2    | 2.07496537 | 0.46300229 | 5.44578602 | 1.55E-05 | 0.00057533 | 3.03784603 |
| MEIS3P1   | -1.1102101 | -0.0036426 | -5.4451588 | 1.55E-05 | 0.00057533 | 3.03634545 |
| WWC3      | -1.3763394 | 0.23423538 | -5.4378433 | 1.58E-05 | 0.00058209 | 3.01884271 |
| COL4A5    | -1.8065056 | -0.4933263 | -5.4350877 | 1.59E-05 | 0.00058316 | 3.01224871 |
| HSPA2     | -1.2448353 | -0.0712463 | -5.4060853 | 1.71E-05 | 0.00061504 | 2.94281456 |
| NDNF      | -3.1851269 | -0.5700294 | -5.4055479 | 1.71E-05 | 0.00061504 | 2.9415275  |
| EPB41L5   | -1.5168013 | 0.18224011 | -5.4029956 | 1.72E-05 | 0.00061722 | 2.93541409 |
| MYLK3     | -2.7197653 | -0.4584766 | -5.3823195 | 1.81E-05 | 0.00063845 | 2.88587291 |
| MYL9      | -1.9794181 | -0.3321306 | -5.3815606 | 1.82E-05 | 0.00063845 | 2.88405398 |
| VTCN1     | 1.76858871 | 0.26639439 | 5.37826358 | 1.83E-05 | 0.00064193 | 2.87615119 |
| ZBED8     | -1.1093411 | -0.0369916 | -5.3755674 | 1.84E-05 | 0.00064448 | 2.869688   |
| FGF1      | -2.1937809 | -0.57108   | -5.3590069 | 1.92E-05 | 0.00066247 | 2.82997935 |
| GOLIM4    | -1.0359071 | -0.0466992 | -5.3574002 | 1.93E-05 | 0.00066336 | 2.82612579 |
| CPA3      | 2.03102301 | 0.63751115 | 5.3515318  | 1.95E-05 | 0.00066805 | 2.81204937 |
| ITIH5     | -1.9144797 | -0.4403168 | -5.3513641 | 1.96E-05 | 0.00066805 | 2.81164701 |
| C14orf132 | -1.6033254 | -0.189293  | -5.3442817 | 1.99E-05 | 0.00067283 | 2.79465555 |
| CTGF      | -1.9896596 | -0.2100113 | -5.340055  | 2.01E-05 | 0.00067468 | 2.78451379 |
| BMP2      | -1.7470447 | 0.05213416 | -5.3339482 | 2.04E-05 | 0.00068142 | 2.76985844 |

|           |            |            |            |          |            |            |
|-----------|------------|------------|------------|----------|------------|------------|
| PTPRD     | -1.1700828 | -0.0384229 | -5.3271776 | 2.08E-05 | 0.00068873 | 2.7536074  |
| PHACTR4   | -1.4876577 | -0.2175744 | -5.3191776 | 2.12E-05 | 0.00069608 | 2.73440167 |
| FAM13B    | -1.1308847 | -0.0431772 | -5.3099017 | 2.17E-05 | 0.0007034  | 2.71212763 |
| LINC00472 | -1.3831028 | -0.3254823 | -5.3051089 | 2.19E-05 | 0.00070826 | 2.70061684 |
| APOD      | -2.3336264 | 0.4314273  | -5.2946878 | 2.25E-05 | 0.00072312 | 2.67558313 |
| ADH1B     | 1.70058287 | 0.34897097 | 5.27637581 | 2.35E-05 | 0.00074737 | 2.63157776 |
| MS4A4A    | 1.44675459 | 0.42617492 | 5.25828532 | 2.46E-05 | 0.00077215 | 2.58808461 |
| EMCN      | -2.0876301 | -0.201069  | -5.2519965 | 2.50E-05 | 0.0007805  | 2.57296034 |
| C7        | 2.00705379 | 0.17314017 | 5.24883711 | 2.52E-05 | 0.00078475 | 2.56536148 |
| MARCKS    | 1.20587236 | 0.29295708 | 5.24577346 | 2.54E-05 | 0.00078884 | 2.55799222 |
| KCNJ8     | 1.2014807  | 0.12569652 | 5.23719072 | 2.59E-05 | 0.0007981  | 2.53734449 |
| CLIC5     | -2.0507399 | -0.5177063 | -5.2235125 | 2.68E-05 | 0.00081794 | 2.50442966 |
| ACTN4     | -1.108503  | -0.1239192 | -5.2216922 | 2.69E-05 | 0.00081973 | 2.50004847 |
| PCOLCE2   | -3.0357988 | -1.0393358 | -5.2172501 | 2.72E-05 | 0.00082686 | 2.48935656 |
| WFS1      | -1.0443951 | -0.093865  | -5.2155716 | 2.73E-05 | 0.00082838 | 2.48531604 |
| LIMS2     | -1.220327  | -0.1178023 | -5.2069954 | 2.79E-05 | 0.00083708 | 2.46466929 |
| NLK       | -1.3320809 | 0.06998208 | -5.2069683 | 2.79E-05 | 0.00083708 | 2.46460406 |
| ZNF302    | -1.0251481 | -0.1536412 | -5.2006908 | 2.83E-05 | 0.00084677 | 2.44948875 |
| COL6A3    | 2.20929666 | 0.47089209 | 5.16899172 | 3.07E-05 | 0.00090241 | 2.37312952 |
| TNNI1     | -1.4788434 | 0.13913321 | -5.1637642 | 3.10E-05 | 0.00091211 | 2.360532   |
| DHCR24    | 1.09708715 | 0.21922937 | 5.12889869 | 3.38E-05 | 0.00098543 | 2.27647568 |
| RARRES1   | 1.94143869 | 0.55094072 | 5.09494431 | 3.68E-05 | 0.00105093 | 2.19455928 |
| P2RY14    | 1.39914566 | 0.38423462 | 5.0838595  | 3.78E-05 | 0.0010732  | 2.16780515 |
| CBX7      | -1.0810364 | -0.2517278 | -5.0476699 | 4.14E-05 | 0.001154   | 2.08042104 |
| THBS2     | 2.01398556 | 0.19608251 | 5.04538973 | 4.16E-05 | 0.00115809 | 2.07491341 |
| LUM       | 2.37461934 | 0.63772041 | 5.04316796 | 4.18E-05 | 0.00116204 | 2.06954668 |
| SERINC5   | -1.4003145 | -0.3537223 | -5.0250797 | 4.38E-05 | 0.00119769 | 2.02584666 |
| LTF       | 3.20361426 | 1.0217732  | 5.00969013 | 4.55E-05 | 0.00123405 | 1.98865625 |
| NELL2     | 1.0604515  | 0.2617838  | 4.99855214 | 4.67E-05 | 0.00126108 | 1.96173468 |
| ZNF204P   | -1.1948635 | -0.125112  | -4.9855589 | 4.83E-05 | 0.00128883 | 1.93032313 |
| SLC14A1   | -1.520068  | -0.1014148 | -4.9825078 | 4.86E-05 | 0.00129354 | 1.92294592 |
| ARHGAP28  | -1.555429  | 0.27363391 | -4.959326  | 5.15E-05 | 0.00135378 | 1.86688609 |
| CD53      | 1.6720554  | 0.17224578 | 4.94997224 | 5.27E-05 | 0.00138009 | 1.84426096 |
| RARRES3   | 1.26233578 | 0.28141891 | 4.93191733 | 5.51E-05 | 0.00142363 | 1.8005816  |
| HRG       | -1.0399418 | -0.2344904 | -4.9186834 | 5.70E-05 | 0.00145415 | 1.76855905 |
| CDC20     | 1.02485266 | 0.31249803 | 4.9149837  | 5.75E-05 | 0.00146475 | 1.75960591 |
| ARL4C     | 1.26178789 | 0.34019534 | 4.90115041 | 5.95E-05 | 0.00150149 | 1.72612629 |
| RBMS1     | -1.164756  | -0.2633317 | -4.868703  | 6.45E-05 | 0.00160916 | 1.64757653 |
| CD48      | 1.73670582 | 0.40911351 | 4.85716767 | 6.64E-05 | 0.00164975 | 1.61964523 |
| EVI2A     | 1.83993049 | 0.39824468 | 4.85523168 | 6.67E-05 | 0.0016546  | 1.61495718 |
| IL13RA2   | -2.409271  | -0.2793709 | -4.8467336 | 6.81E-05 | 0.00168362 | 1.59437789 |
| APOLD1    | -2.0601072 | 0.18888428 | -4.8228551 | 7.23E-05 | 0.00176683 | 1.5365447  |
| HMBOX1    | -1.0347803 | 0.11480676 | -4.7937625 | 7.77E-05 | 0.00188207 | 1.46606856 |
| FZD2      | -1.8398464 | -0.6353513 | -4.7882362 | 7.88E-05 | 0.00190218 | 1.45267964 |
| GADD45B   | -1.0384621 | -0.1027344 | -4.7880225 | 7.89E-05 | 0.00190218 | 1.4521618  |
| EHD3      | -2.334505  | -0.1837545 | -4.7840129 | 7.96E-05 | 0.00190739 | 1.44244729 |
| PTPRO     | -1.6239951 | -0.4208778 | -4.7752576 | 8.14E-05 | 0.00193534 | 1.42123386 |

|           |            |            |            |            |            |            |
|-----------|------------|------------|------------|------------|------------|------------|
| CD3D      | 1.64922447 | 0.44807582 | 4.7722514  | 8.20E-05   | 0.00194638 | 1.41394969 |
| TRBC1     | 1.84921943 | 0.57148554 | 4.75300644 | 8.60E-05   | 0.00202735 | 1.3673161  |
| PSD3      | -1.0007983 | 0.02274556 | -4.7032491 | 9.74E-05   | 0.00222351 | 1.24672871 |
| DDN       | -1.9036024 | -0.4502267 | -4.6837632 | 0.00010224 | 0.00229297 | 1.1994999  |
| CST6      | 1.03923557 | 0.22030743 | 4.68131616 | 0.00010286 | 0.00229297 | 1.19356879 |
| PHYHIP    | -1.0607184 | -0.1881158 | -4.6436888 | 0.00011298 | 0.00246441 | 1.10236664 |
| TDO2      | 1.5665464  | 0.56807917 | 4.63279751 | 0.00011609 | 0.00251564 | 1.07596809 |
| MYLK      | -1.0742671 | -0.1187087 | -4.6288247 | 0.00011724 | 0.00253238 | 1.06633879 |
| CD2       | 1.44907904 | 0.52452972 | 4.6109575  | 0.00012258 | 0.0026222  | 1.02303293 |
| IRF8      | 1.58324718 | 0.17347202 | 4.61093322 | 0.00012259 | 0.0026222  | 1.0229741  |
| WASF3     | -1.1125532 | -0.0572186 | -4.6076135 | 0.00012361 | 0.00263973 | 1.01492809 |
| HIST1H2BK | -1.5943831 | -0.3325095 | -4.6054326 | 0.00012428 | 0.00264984 | 1.00964217 |
| ROBO1     | -1.4600043 | -0.4258896 | -4.5926513 | 0.00012831 | 0.00271315 | 0.9786648  |
| ITGB2     | 1.28860094 | 0.16742303 | 4.59136642 | 0.00012872 | 0.00271381 | 0.97555075 |
| SBSPON    | -1.2342722 | 0.20143808 | -4.5661244 | 0.00013708 | 0.00283136 | 0.91437711 |
| CSRP1     | -1.3277556 | -0.1547895 | -4.5642618 | 0.00013772 | 0.00283136 | 0.90986317 |
| PPFIA4    | -1.0267548 | 0.11374033 | -4.553247  | 0.00014156 | 0.00287838 | 0.88317121 |
| C3        | 2.6799609  | 0.77577156 | 4.53676614 | 0.0001475  | 0.00295516 | 0.84323642 |
| PAMR1     | -1.595066  | 0.11264352 | -4.5333549 | 0.00014876 | 0.00297501 | 0.83497117 |
| SOWAHC    | -1.325626  | -0.2909477 | -4.5151881 | 0.00015566 | 0.00308061 | 0.79095657 |
| CHN1      | -1.1559735 | -0.1705286 | -4.503134  | 0.00016041 | 0.00315079 | 0.76175481 |
| ALDH1A3   | 1.0005169  | 0.26579621 | 4.48982293 | 0.00016583 | 0.00322454 | 0.72951138 |
| KANK3     | -1.4183004 | -0.1774388 | -4.4897136 | 0.00016587 | 0.00322454 | 0.7292465  |
| MPDZ      | -1.0449727 | -0.195125  | -4.4708836 | 0.00017385 | 0.00333727 | 0.68364078 |
| GADD45A   | -1.1318259 | -0.1227134 | -4.4676663 | 0.00017525 | 0.00334892 | 0.67584935 |
| HPGD      | -1.4249228 | -0.1808383 | -4.4559214 | 0.00018047 | 0.00341775 | 0.64740848 |
| ZBTB16    | -1.2617673 | -0.0855308 | -4.4553172 | 0.00018074 | 0.003418   | 0.64594565 |
| CTSV      | -1.8302748 | -0.2845664 | -4.4442438 | 0.0001858  | 0.00348881 | 0.61913406 |
| PLBD1     | -1.1650364 | -0.1361406 | -4.4294485 | 0.00019279 | 0.00358162 | 0.58331607 |
| TNNC1     | -1.1870409 | 0.26836814 | -4.4289653 | 0.00019302 | 0.00358162 | 0.58214648 |
| NQO1      | -1.1602048 | -0.19483   | -4.4263806 | 0.00019427 | 0.00359171 | 0.57588984 |
| SFN       | 1.10908072 | 0.36097272 | 4.41127868 | 0.00020173 | 0.00370374 | 0.53933739 |
| PCDHA1    | -1.0043442 | -0.1872676 | -4.3881641 | 0.00021371 | 0.00388051 | 0.48340503 |
| TYROBP    | 1.38309974 | -0.137322  | 4.36225003 | 0.00022798 | 0.00403721 | 0.42072043 |
| HLA-DPA1  | 1.1308684  | 0.09563268 | 4.35495458 | 0.00023217 | 0.00408626 | 0.40307764 |
| WISP3     | -1.4033828 | -0.1844735 | -4.3544572 | 0.00023246 | 0.00408626 | 0.40187498 |
| PLCG2     | -1.1676663 | -0.3275556 | -4.3520872 | 0.00023384 | 0.00409959 | 0.39614394 |
| PNMAL1    | -1.0203611 | -0.1794733 | -4.3503268 | 0.00023487 | 0.00410588 | 0.39188713 |
| ACKR1     | 1.06104959 | 0.26558028 | 4.34455463 | 0.00023827 | 0.0041381  | 0.37793072 |
| BCL2L2    | -1.1018939 | -0.2872519 | -4.3413709 | 0.00024017 | 0.00415365 | 0.37023328 |
| GZMK      | 1.76742319 | 0.52744638 | 4.3192398  | 0.00025381 | 0.00430712 | 0.3167384  |
| INTS12    | -1.0775546 | -0.2642577 | -4.3153052 | 0.00025631 | 0.00433468 | 0.30723005 |
| SERPINF1  | 1.43702436 | 0.18849146 | 4.31511845 | 0.00025643 | 0.00433468 | 0.30677867 |
| IL10RA    | 1.46816246 | 0.55987627 | 4.30902454 | 0.00026036 | 0.00437868 | 0.29205339 |
| TLR1      | 1.06006433 | 0.17614057 | 4.30616325 | 0.00026222 | 0.00439327 | 0.28513997 |
| WFDC2     | 1.91991632 | 0.35687667 | 4.29398791 | 0.00027031 | 0.00450021 | 0.25572627 |
| BLNK      | 1.50476047 | 0.47657865 | 4.28283849 | 0.00027793 | 0.00459882 | 0.22879721 |



|           |            |            |            |            |            |            |
|-----------|------------|------------|------------|------------|------------|------------|
| SPP1      | 1.03593415 | 0.10691798 | 4.25438877 | 0.00029836 | 0.00482179 | 0.16011121 |
| SERINC1   | -1.4669317 | -0.3872394 | -4.2543686 | 0.00029838 | 0.00482179 | 0.16006255 |
| CRHBP     | -1.7391645 | -0.0227677 | -4.2513914 | 0.0003006  | 0.00483961 | 0.15287713 |
| ARF5      | 1.0474205  | 0.16368287 | 4.24995839 | 0.00030167 | 0.00483961 | 0.14941878 |
| RNF220    | -1.1002366 | -0.1713192 | -4.2428808 | 0.00030705 | 0.00490197 | 0.1323397  |
| MMP7      | 2.08644947 | 0.3664965  | 4.22478643 | 0.00032121 | 0.00507628 | 0.0886884  |
| DHRS3     | -1.1434697 | -0.3112043 | -4.2114708 | 0.00033205 | 0.00521305 | 0.05657762 |
| EFNB2     | -1.113034  | -0.0313686 | -4.2079314 | 0.00033499 | 0.00524057 | 0.04804409 |
| CMAHP     | -1.0516211 | 0.03795875 | -4.1803726 | 0.00035881 | 0.00552162 | -0.0183742 |
| XYLT1     | -1.1701675 | -0.0557407 | -4.1698586 | 0.00036833 | 0.00564189 | -0.0437007 |
| MRC1      | 1.40414731 | 0.06371213 | 4.15468092 | 0.00038252 | 0.00583223 | -0.0802484 |
| CORO1A    | 1.57176437 | 0.21648793 | 4.12984691 | 0.00040692 | 0.00610649 | -0.1400138 |
| GPR171    | 1.24085613 | 0.41901385 | 4.12662865 | 0.0004102  | 0.00614088 | -0.1477557 |
| CXCL6     | 2.25836252 | 0.65950348 | 4.12376932 | 0.00041313 | 0.00617077 | -0.1546334 |
| MAP1B     | -1.0257065 | 0.0052139  | -4.1198418 | 0.00041719 | 0.00621035 | -0.1640797 |
| FCER1A    | 1.23423975 | 0.44696628 | 4.1192384  | 0.00041781 | 0.00621269 | -0.1655307 |
| GZMA      | 1.80609457 | 0.69654553 | 4.1173472  | 0.00041979 | 0.006228   | -0.1700788 |
| PODXL     | -1.9920988 | -0.554066  | -4.1126651 | 0.00042471 | 0.00629394 | -0.1813373 |
| CD52      | 1.68645646 | 0.51930998 | 4.0947449  | 0.00044408 | 0.00649364 | -0.2244132 |
| EML1      | -1.1366652 | 0.21740526 | -4.0932036 | 0.00044578 | 0.00651139 | -0.2281168 |
| NXF3      | -1.1233997 | 0.11601866 | -4.0580172 | 0.00048656 | 0.00696087 | -0.3126178 |
| ARHGAP15  | 1.00396781 | 0.1945954  | 4.05360053 | 0.00049193 | 0.00700412 | -0.3232172 |
| IL7R      | 1.58672656 | 0.51282842 | 4.04259074 | 0.00050559 | 0.00713491 | -0.3496321 |
| LY86      | 1.22161809 | 0.33488263 | 4.03842782 | 0.00051085 | 0.00719155 | -0.3596172 |
| GPR64     | 1.00908951 | 0.22370603 | 4.0274534  | 0.00052497 | 0.00730485 | -0.3859327 |
| CAPG      | 1.31122373 | -0.1148726 | 4.02644619 | 0.00052629 | 0.00731546 | -0.3883474 |
| AP1M2     | 1.01987783 | 0.03452392 | 4.02231648 | 0.00053172 | 0.00735997 | -0.3982468 |
| PLAT      | -2.2454256 | -0.0403544 | -4.0051053 | 0.00055495 | 0.00755495 | -0.4394876 |
| SST       | -2.176176  | -0.1692437 | -3.9937655 | 0.0005708  | 0.00771515 | -0.4666445 |
| IGF1      | -1.5083408 | 0.27170441 | -3.9893275 | 0.00057713 | 0.0077768  | -0.4772695 |
| LAPTM5    | 1.35202593 | 0.28701822 | 3.96816363 | 0.00060826 | 0.00809707 | -0.5279113 |
| TGFBI     | 1.32786037 | 0.16093074 | 3.9666561  | 0.00061054 | 0.00810317 | -0.5315169 |
| GPX1      | 1.17228968 | -0.0482937 | 3.94903574 | 0.00063783 | 0.00831506 | -0.5736429 |
| CDH10     | -1.4872794 | 0.30203639 | -3.9321964 | 0.00066504 | 0.0085593  | -0.6138718 |
| IGJ       | 2.54267848 | 0.81344223 | 3.92784775 | 0.00067225 | 0.00861087 | -0.6242558 |
| CCL5      | 1.60747085 | 0.43949396 | 3.92717415 | 0.00067337 | 0.0086129  | -0.6258641 |
| PYCARD    | 1.48850665 | 0.27618415 | 3.90547555 | 0.00071058 | 0.00891191 | -0.6776454 |
| HMOX1     | 1.34860483 | 0.32673486 | 3.87839272 | 0.00075989 | 0.00935285 | -0.7422022 |
| FBXO3     | -1.1375499 | -0.3163358 | -3.8701973 | 0.00077546 | 0.00950034 | -0.7617208 |
| TIPARP    | -1.1896933 | 0.05277217 | -3.8683684 | 0.00077898 | 0.0095334  | -0.7660757 |
| CCL19     | 1.93127064 | 0.73774251 | 3.86039527 | 0.00079451 | 0.00966203 | -0.7850556 |
| TYRP1     | -1.4565548 | 0.15758058 | -3.8534954 | 0.00080819 | 0.00977447 | -0.8014746 |
| LINC00341 | -1.0097183 | -0.068678  | -3.8310766 | 0.00085428 | 0.01020115 | -0.8547829 |
| RAMP3     | -1.3121388 | -0.2459433 | -3.7858595 | 0.00095526 | 0.01109974 | -0.9621091 |
| ABCA8     | 1.64670353 | 0.03788443 | 3.78006644 | 0.00096902 | 0.01123633 | -0.9758399 |
| RRM2      | 1.34926405 | 0.37174093 | 3.77840367 | 0.000973   | 0.01126844 | -0.9797803 |
| CLU       | 1.68660343 | 0.02480874 | 3.76060423 | 0.00101669 | 0.01162941 | -1.021937  |

|         |            |            |            |            |            |            |
|---------|------------|------------|------------|------------|------------|------------|
| ITGA8   | -1.3835246 | 0.00192619 | -3.7598201 | 0.00101866 | 0.01163839 | -1.0237932 |
| ETNPPL  | -1.3354171 | -0.160996  | -3.7491717 | 0.00104576 | 0.01187623 | -1.0489912 |
| PLTP    | -1.2528221 | -0.0554994 | -3.7442073 | 0.00105864 | 0.01197513 | -1.0607334 |
| MTHFD2  | -1.2934309 | -0.1886762 | -3.7260919 | 0.00110697 | 0.01242668 | -1.1035517 |
| RRAS    | -1.174842  | -0.1736962 | -3.7234234 | 0.00111427 | 0.01246703 | -1.1098551 |
| TMEM45A | -1.0608455 | -0.112351  | -3.7213723 | 0.00111992 | 0.01251411 | -1.1146995 |
| DYNC1H1 | -1.5858594 | -0.1882073 | -3.6938567 | 0.00119841 | 0.01311402 | -1.1796261 |
| RGS2    | -1.1800686 | -0.3827164 | -3.6933625 | 0.00119986 | 0.01311912 | -1.1807911 |
| GABRP   | 1.24528253 | 0.35370781 | 3.68168726 | 0.00123482 | 0.01339293 | -1.2083052 |
| NPHS2   | -2.2605297 | -0.6909711 | -3.6802432 | 0.00123922 | 0.01342565 | -1.2117069 |
| NELL1   | -1.9667911 | 0.09157661 | -3.6154305 | 0.00145301 | 0.01496933 | -1.3640417 |
| SFRP1   | 1.42891449 | 0.20506317 | 3.6145126  | 0.00145628 | 0.01496933 | -1.3661943 |
| CETP    | -1.0842034 | 0.0726094  | -3.5948998 | 0.00152799 | 0.01550153 | -1.4121535 |
| BAMBI   | -1.1758499 | -0.1584885 | -3.5866891 | 0.00155903 | 0.01567209 | -1.4313742 |
| LTB     | 1.70845662 | 0.39727288 | 3.56554773 | 0.00164182 | 0.01625743 | -1.4808112 |
| RASGRP1 | 1.24862264 | -0.023284  | 3.55478918 | 0.00168559 | 0.01663125 | -1.5059387 |
| ITGBL1  | -1.0694416 | 0.35834856 | -3.5125796 | 0.00186863 | 0.01796876 | -1.6043195 |
| GPR18   | 1.40116608 | 0.54766837 | 3.50960602 | 0.00188223 | 0.01802985 | -1.6112378 |
| TSPAN1  | 1.37099368 | 0.15154359 | 3.50093141 | 0.00192247 | 0.01830917 | -1.6314104 |
| PPAP2B  | -1.3016029 | 0.05251444 | -3.4947387 | 0.00195171 | 0.01850765 | -1.6458026 |
| ENPEP   | -1.1217472 | -0.3000815 | -3.4788399 | 0.00202879 | 0.01897984 | -1.6827182 |
| VIM     | -1.4663406 | -0.3992166 | -3.4651263 | 0.00209765 | 0.01940667 | -1.7145204 |
| CYP24A1 | 1.44221094 | 0.43368604 | 3.46320459 | 0.00210748 | 0.01946806 | -1.7189739 |
| TLR7    | 1.33724787 | 0.42208305 | 3.4467221  | 0.00219367 | 0.02010962 | -1.7571411 |
| KDR     | -1.2676538 | 0.1750265  | -3.4433225 | 0.00221187 | 0.02020275 | -1.7650065 |
| AGR2    | 1.27389812 | 0.3821019  | 3.43885678 | 0.002236   | 0.0203565  | -1.7753349 |
| EVI2B   | 1.49249104 | 0.20899801 | 3.42543422 | 0.00231008 | 0.02081594 | -1.8063541 |
| RAPGEF4 | -1.1163243 | 0.10251541 | -3.4198345 | 0.00234169 | 0.02103061 | -1.8192839 |
| LYZ     | 1.52953237 | -0.0515875 | 3.39571031 | 0.00248276 | 0.02198311 | -1.8749114 |
| FMO3    | 1.0010121  | 0.24380604 | 3.38896643 | 0.00252366 | 0.02222535 | -1.8904398 |
| IGFBP1  | -1.9249852 | 0.83652451 | -3.3670478 | 0.00266116 | 0.02308256 | -1.9408412 |
| DOCK2   | 1.00953718 | 0.19740941 | 3.36292895 | 0.0026878  | 0.02324024 | -1.9503006 |
| PFN1    | 1.24031762 | 0.13668063 | 3.35921082 | 0.00271207 | 0.02331002 | -1.9588365 |
| OLFM4   | 1.79103101 | 0.5500843  | 3.32679973 | 0.00293286 | 0.02461553 | -2.0331124 |
| HABP2   | 1.22068939 | 0.17563035 | 3.31660045 | 0.00300588 | 0.02503767 | -2.0564362 |
| FAM153A | -2.0748587 | -0.0291549 | -3.3135147 | 0.00302832 | 0.02516116 | -2.063488  |
| LDB2    | -1.2698435 | 0.31073733 | -3.3025155 | 0.00310964 | 0.02560358 | -2.0886058 |
| SGK1    | -1.0661942 | -0.1806604 | -3.2934199 | 0.00317848 | 0.02590403 | -2.1093552 |
| VILL    | -1.1903653 | 0.10983122 | -3.2441161 | 0.00357815 | 0.02820489 | -2.221482  |
| TNFAIP8 | 1.15226302 | 0.25369246 | 3.22135106 | 0.00377873 | 0.02930947 | -2.2730508 |
| EGF     | -1.2818407 | -0.3104703 | -3.2211708 | 0.00378036 | 0.02930947 | -2.2734587 |
| PTPRB   | -1.3378635 | 0.32560012 | -3.210998  | 0.00387351 | 0.02982177 | -2.2964596 |
| PLAC8   | 1.26290681 | 0.36269528 | 3.18118316 | 0.00415949 | 0.03141376 | -2.363717  |
| KIRREL  | -1.2591149 | 0.45752475 | -3.1656445 | 0.00431651 | 0.03227372 | -2.3986764 |
| COL15A1 | 1.07040003 | 0.3263239  | 3.16159707 | 0.00435834 | 0.03242144 | -2.407772  |
| GMDS    | -1.0447862 | -0.391072  | -3.1538334 | 0.00443968 | 0.03286007 | -2.4252061 |
| HOPX    | 1.0268517  | 0.10257294 | 3.14471637 | 0.00453706 | 0.03342586 | -2.4456586 |

|          |            |            |            |            |            |            |
|----------|------------|------------|------------|------------|------------|------------|
| AKR1B10  | 1.70544693 | 0.65519599 | 3.11141338 | 0.00491061 | 0.03556897 | -2.5201726 |
| GPR183   | 1.14713249 | 0.4440584  | 3.09834836 | 0.00506511 | 0.03621899 | -2.5493198 |
| CCDC19   | -1.2396695 | -0.0581964 | -3.0893729 | 0.00517394 | 0.03663328 | -2.5693152 |
| C4A      | 1.01295688 | 0.3028222  | 3.01509836 | 0.00616507 | 0.04147383 | -2.7338738 |
| SLC6A8   | 1.00243815 | 0.31198609 | 2.9917247  | 0.006513   | 0.04313393 | -2.785313  |
| IGLC1    | 1.82580269 | 0.49997849 | 2.97233447 | 0.00681583 | 0.04449969 | -2.8278558 |
| OGDHL    | 1.0364712  | 0.15349228 | 2.94277786 | 0.00730351 | 0.04666266 | -2.8924726 |
| REG1A    | 1.51690213 | 0.53402818 | 2.93693197 | 0.00740383 | 0.04704025 | -2.9052193 |
| IGFBP2   | -1.5942445 | -0.3751163 | -2.8830952 | 0.00839175 | 0.05161199 | -3.0220734 |
| CRIP1    | 1.0075262  | 0.14310469 | 2.82789123 | 0.00953449 | 0.05631655 | -3.1408618 |
| PTPRC    | 1.15349287 | 0.39453808 | 2.8182744  | 0.00974812 | 0.05727127 | -3.1614451 |
| GABBR1   | 1.20006923 | 0.18941123 | 2.79477918 | 0.0102893  | 0.05934305 | -3.2115918 |
| CHL1     | 1.0500883  | 0.14197688 | 2.78246176 | 0.01058428 | 0.06061979 | -3.2378005 |
| TAC1     | 1.6762292  | 0.77674442 | 2.76494331 | 0.01101765 | 0.0622369  | -3.2749788 |
| HRSP12   | -1.4719011 | -0.5126495 | -2.7330841 | 0.01184913 | 0.06496626 | -3.3422947 |
| UMOD     | -1.6261223 | -0.364322  | -2.7258738 | 0.01204537 | 0.0655798  | -3.3574757 |
| SOX9     | 1.03897049 | 0.11471765 | 2.69520395 | 0.01291488 | 0.06895066 | -3.4218232 |
| CYAT1    | 2.41208866 | 0.79775508 | 2.66955112 | 0.01368726 | 0.07178398 | -3.4753591 |
| MEIS2    | -1.0700754 | 0.10778358 | -2.6640234 | 0.01385929 | 0.07227057 | -3.4868605 |
| SPINK1   | 1.31725546 | 0.28569068 | 2.64888846 | 0.01434077 | 0.0739878  | -3.5182881 |
| HLA-DRA  | 1.04235007 | 0.17182849 | 2.64415887 | 0.01449443 | 0.0743219  | -3.5280899 |
| ID3      | -1.0888845 | -0.3528104 | -2.6070885 | 0.01575344 | 0.07874096 | -3.6045953 |
| TAGLN    | 1.21705301 | -0.0193722 | 2.51556468 | 0.01931385 | 0.09024735 | -3.7909693 |
| ADAMDEC1 | 1.02034338 | 0.3583858  | 2.49852815 | 0.02005433 | 0.09275654 | -3.8252535 |
| CYTIP    | 1.02005094 | -0.0406871 | 2.49408172 | 0.02025189 | 0.09331117 | -3.8341799 |
| IGLL3P   | 1.42860448 | 0.53533593 | 2.47450658 | 0.02114334 | 0.09614508 | -3.8733703 |
| PROM1    | 1.09826981 | 0.20030834 | 2.46799131 | 0.02144803 | 0.09719626 | -3.8863751 |
| ALDH1A1  | 1.18781875 | 0.04599831 | 2.43420064 | 0.02309465 | 0.10279061 | -3.9535059 |
| FOSB     | -1.8965314 | -0.3876091 | -2.4051263 | 0.02460426 | 0.10712576 | -4.0108349 |
| SELL     | 1.02745436 | 0.18455069 | 2.38583668 | 0.02565556 | 0.1097154  | -4.0486459 |
| CYP26B1  | -1.0979139 | 0.38397581 | -2.3591281 | 0.0271796  | 0.11402322 | -4.1006992 |
| APOH     | -1.0323392 | -0.3197027 | -2.3387246 | 0.02839949 | 0.11724325 | -4.140226  |
| KRT19    | 1.13994828 | -0.244671  | 2.3246029  | 0.02927302 | 0.11950588 | -4.1674611 |
| SIK1     | -1.0459855 | 0.12694337 | -2.2359672 | 0.03534119 | 0.13473469 | -4.3360602 |
| ATF3     | -1.4837991 | -0.0073945 | -2.1804965 | 0.03969976 | 0.1457753  | -4.4394519 |



Supplementary Table 3: The sequences of primers used in real-time PCR.

| Gene           |      | Sequence(5'-3')            |
|----------------|------|----------------------------|
| LCK            | FOR: | CCGAATGGTGCGACCTGACAAC     |
|                | REV: | TCCAGAACGCTCCGAAGGTAGTC    |
| CD48           | FOR: | AGCAATCCTGTAAGCAGCGAGAAC   |
|                | REV: | GGATAACGTGACCACTAGCCAAGC   |
| CD3D           | FOR: | AGTCTGCTACTGGCTACTGTTCTCC  |
|                | REV: | AGATGCCTGATGCTGGTGTGTC     |
| ITGB2          | FOR: | ACTCGGAGGGCTGCTGGATAAC     |
|                | REV: | CCAGATGACCAGGAGGAGGACAC    |
| IL10RA         | FOR: | ACCAGGACCAGGATGACAGTGAC    |
|                | REV: | GTTCTGCTGCTTCCTCCTTCCATC   |
| IL7R           | FOR: | CTGCCAAGCTCCAGAAACACAAATG  |
|                | REV: | GAGATGGGCTGTCCTTGAGAACTG   |
| CCL5           | FOR: | GACACCACTCCCTGCTGCTTTG     |
|                | REV: | CTCTGGGTTGGCACACACTTGG     |
| PTPRC          | FOR: | GGCAAGGAACAACCGACGATGG     |
|                | REV: | CTTGGCTGCTGAGTGTCTGAGTG    |
| TLR7           | FOR: | GGTATGCCACCGAATCTAACGACTC  |
|                | REV: | GCCAATCTCGCAGGGACAGTTG     |
| MYD88          | FOR: | GTCTCCAGGTGTCCAACAGAAGC    |
|                | REV: | GTCGCAGATAGTGATGAACCGTAGG  |
| Nf-kB          | FOR: | TGTGGTGGAGGACTTGCTGAGG     |
|                | REV: | AGTGCTGCCTTGCTGTTCTTGAG    |
| $\beta$ -actin | FOR: | CACCCAGCACAAATGAAGATCAAGAT |
|                | REV: | CCAGTTTTTAAATCCTGAGTCAAGC  |

FOR:forward primer;

REV:reverse primer;

**Supplementary Table 4: Hyperparameter selection table for machine learning models**

| Parameters       | Parameter selection range                       | Final value        |
|------------------|-------------------------------------------------|--------------------|
| SVM              |                                                 |                    |
| Kernel           | linear, polynomial,<br>or radial basis function | radial             |
| C                | $2^{-2}$ –10                                    | $2^{-1}$           |
| $\gamma$         | $2^{-9}$ –1                                     | 0.1                |
| RF               |                                                 |                    |
| Trees            | 100–1000                                        | 500                |
| features         | 2–16                                            | 4                  |
| KNN              |                                                 |                    |
| adjacent samples | 1–30                                            | 3                  |
| distance         | Manhattan distance or<br>Euclidean distance     | Euclidean distance |
| Adaboost         |                                                 |                    |
| maxdepth         | 1–15                                            | 2                  |
| mfinal           |                                                 | 4                  |

**Supplementary Table 5:** Evaluation metrics for the validation set GSE47183

| Model    | AUC   | Accuracy | Sensitivity | Specificity | Precision | Recall | F1-score |
|----------|-------|----------|-------------|-------------|-----------|--------|----------|
| Adaboost | 0.899 | 0.791    | 0.778       | 0.812       | 0.875     | 0.778  | 0.824    |
| KNN      | 0.861 | 0.791    | 0.926       | 0.563       | 0.781     | 0.926  | 0.848    |
| SVM      | 0.894 | 0.721    | 0.630       | 0.875       | 0.895     | 0.630  | 0.739    |
| RF       | 0.932 | 0.837    | 0.889       | 0.750       | 0.857     | 0.889  | 0.873    |

**Supplementary Table 6:** Evaluation metrics for the validation set GSE30529

| Model    | AUC   | Accuracy | Sensitivity | Specificity | Precision | Recall | F1-score |
|----------|-------|----------|-------------|-------------|-----------|--------|----------|
| Adaboost | 0.891 | 0.791    | 0.800       | 0.783       | 0.762     | 0.800  | 0.781    |
| KNN      | 0.780 | 0.767    | 0.800       | 0.739       | 0.727     | 0.800  | 0.762    |
| SVM      | 0.861 | 0.767    | 0.850       | 0.696       | 0.708     | 0.850  | 0.773    |
| RF       | 0.899 | 0.837    | 0.800       | 0.869       | 0.842     | 0.800  | 0.821    |
